# Supplementary material for: Detection of DNA oligonucleotides with base mutations by terahertz spectroscopy and microstructures
Source: PubMed Central journal article supplement (PMC5783420; doi:10.1371/journal.pone.0191515), 2018-01-24
Supplement: pone.0191515.s001.pdf [file pone.0191515.s001.pdf]

## Supporting Information

Plotting data of Fig. 3a

| Frequency (THz) | Absorption Coefficient( $\text{cm}^{-1}$ ) |         |          |         |          |         |          |         |          |         |
|-----------------|--------------------------------------------|---------|----------|---------|----------|---------|----------|---------|----------|---------|
|                 | Buffer                                     | SD      | Ter-5A   | SD      | Ter-5C   | SD      | Ter-5T   | SD      | Ter-5G   | SD      |
| 0.6             | 156.9963                                   | 0.70669 | 150.5643 | 0.08453 | 151.907  | 0.3015  | 150.6561 | 0.64726 | 151.6095 | 0.95336 |
| 0.6125          | 158.649                                    | 0.6778  | 152.1518 | 0.09003 | 153.6454 | 0.35403 | 152.2486 | 0.67506 | 153.1944 | 0.94573 |
| 0.625           | 160.3367                                   | 0.65135 | 153.7779 | 0.09295 | 155.4    | 0.41111 | 153.8739 | 0.70313 | 154.8181 | 0.93383 |
| 0.6375          | 162.0189                                   | 0.62793 | 155.4031 | 0.09395 | 157.131  | 0.47093 | 155.4916 | 0.73013 | 156.4406 | 0.91924 |
| 0.65            | 163.739                                    | 0.60788 | 157.0723 | 0.09439 | 158.8825 | 0.53036 | 157.1456 | 0.75369 | 158.1058 | 0.90421 |
| 0.6625          | 165.5249                                   | 0.59155 | 158.8141 | 0.09477 | 160.6846 | 0.58794 | 158.8648 | 0.77297 | 159.842  | 0.89016 |
| 0.675           | 167.368                                    | 0.57928 | 160.6196 | 0.09473 | 162.5316 | 0.64392 | 160.6405 | 0.78824 | 161.6397 | 0.87816 |
| 0.6875          | 169.263                                    | 0.57124 | 162.4828 | 0.09326 | 164.4219 | 0.69903 | 162.4697 | 0.8007  | 163.4937 | 0.8678  |
| 0.7             | 171.1639                                   | 0.5675  | 164.3571 | 0.08983 | 166.3128 | 0.75358 | 164.3086 | 0.81092 | 165.3579 | 0.85901 |
| 0.7125          | 173.0718                                   | 0.56791 | 166.2427 | 0.08416 | 168.2082 | 0.80778 | 166.1589 | 0.81955 | 167.2326 | 0.85215 |
| 0.725           | 175.0413                                   | 0.57228 | 168.1944 | 0.07607 | 170.1655 | 0.86095 | 168.0769 | 0.82703 | 169.1725 | 0.84704 |
| 0.7375          | 177.0706                                   | 0.58055 | 170.2105 | 0.06596 | 172.1852 | 0.91271 | 170.061  | 0.83324 | 171.1754 | 0.84375 |
| 0.75            | 179.1454                                   | 0.59281 | 172.2771 | 0.05424 | 174.2565 | 0.96371 | 172.0978 | 0.83828 | 173.2264 | 0.84301 |
| 0.7625          | 181.2423                                   | 0.60857 | 174.3708 | 0.04178 | 176.3591 | 1.01426 | 174.1649 | 0.84209 | 175.303  | 0.84534 |
| 0.775           | 183.3322                                   | 0.62751 | 176.4619 | 0.02955 | 178.4645 | 1.06428 | 176.232  | 0.8438  | 177.3756 | 0.8511  |
| 0.7875          | 185.4587                                   | 0.6495  | 178.5935 | 0.01787 | 180.6162 | 1.1136  | 178.3412 | 0.84366 | 179.487  | 0.86024 |
| 0.8             | 187.6561                                   | 0.67409 | 180.7996 | 0.0072  | 182.8478 | 1.16305 | 180.5254 | 0.84406 | 181.6707 | 0.87167 |
| 0.8125          | 189.9017                                   | 0.70026 | 183.0567 | 0.00257 | 185.1347 | 1.21336 | 182.7595 | 0.8465  | 183.9031 | 0.88423 |
| 0.825           | 192.1785                                   | 0.72703 | 185.348  | 0.00938 | 187.4594 | 1.26434 | 185.0253 | 0.85105 | 186.1682 | 0.89571 |
| 0.8375          | 194.4594                                   | 0.75353 | 187.6468 | 0.01489 | 189.7927 | 1.31503 | 187.2929 | 0.85634 | 188.4393 | 0.90594 |
| 0.85            | 196.7524                                   | 0.77865 | 189.9615 | 0.01825 | 192.1398 | 1.36596 | 189.5677 | 0.86203 | 190.7242 | 0.91552 |
| 0.8625          | 199.115                                    | 0.80167 | 192.3483 | 0.01811 | 194.5543 | 1.41759 | 191.9041 | 0.86748 | 193.0794 | 0.92456 |
| 0.875           | 201.5483                                   | 0.8211  | 194.809  | 0.01096 | 197.0344 | 1.46863 | 194.3012 | 0.87003 | 195.505  | 0.93464 |
| 0.8875          | 204.0232                                   | 0.83564 | 197.3156 | 0.00635 | 199.5494 | 1.51818 | 196.729  | 0.86863 | 197.9722 | 0.94696 |
| 0.9             | 206.5197                                   | 0.84393 | 199.8481 | 0.0308  | 202.0777 | 1.56582 | 199.167  | 0.86323 | 200.4612 | 0.96134 |
| 0.9125          | 209.0247                                   | 0.84584 | 202.3917 | 0.0648  | 204.6022 | 1.61198 | 201.6006 | 0.85376 | 202.9568 | 0.97781 |
| 0.925           | 211.5774                                   | 0.8414  | 204.9833 | 0.10496 | 207.1604 | 1.65781 | 204.069  | 0.84106 | 205.4966 | 0.99649 |
| 0.9375          | 214.2118                                   | 0.83055 | 207.6573 | 0.15143 | 209.7867 | 1.70194 | 206.6076 | 0.82462 | 208.115  | 1.01839 |

|        |          |         |          |         |          |         |          |         |          |         |
|--------|----------|---------|----------|---------|----------|---------|----------|---------|----------|---------|
| 0.95   | 216.8952 | 0.81461 | 210.3825 | 0.20434 | 212.4493 | 1.74127 | 209.1846 | 0.80096 | 210.7808 | 1.04669 |
| 0.9625 | 219.596  | 0.79539 | 213.1277 | 0.26134 | 215.1188 | 1.77456 | 211.7709 | 0.7676  | 213.464  | 1.08305 |
| 0.975  | 222.2985 | 0.7747  | 215.8762 | 0.32123 | 217.7804 | 1.79996 | 214.3537 | 0.72374 | 216.1475 | 1.1312  |
| 0.9875 | 225.017  | 0.75476 | 218.6408 | 0.38585 | 220.4488 | 1.81545 | 216.949  | 0.66995 | 218.8429 | 1.19469 |
| 1      | 227.799  | 0.73907 | 221.4668 | 0.45755 | 223.174  | 1.81799 | 219.6049 | 0.60601 | 221.5971 | 1.27391 |
| 1.0125 | 230.6368 | 0.73094 | 224.349  | 0.53609 | 225.9553 | 1.8049  | 222.3166 | 0.53071 | 224.4049 | 1.36771 |
| 1.025  | 233.4792 | 0.73458 | 227.2357 | 0.61615 | 228.7454 | 1.78065 | 225.0365 | 0.44861 | 227.2169 | 1.47141 |
| 1.0375 | 236.3011 | 0.75227 | 230.0959 | 0.69122 | 231.5198 | 1.75195 | 227.741  | 0.36619 | 230.0079 | 1.57936 |
| 1.05   | 239.1044 | 0.78396 | 232.9273 | 0.75812 | 234.2815 | 1.72018 | 230.4325 | 0.28574 | 232.7792 | 1.68934 |
| 1.0625 | 241.9224 | 0.82714 | 235.762  | 0.81604 | 237.0662 | 1.68496 | 233.1452 | 0.20788 | 235.5659 | 1.79883 |
| 1.075  | 244.7807 | 0.87841 | 238.626  | 0.86561 | 239.9002 | 1.64515 | 235.9046 | 0.13231 | 238.3952 | 1.90453 |
| 1.0875 | 247.6408 | 0.93451 | 241.4785 | 0.90354 | 242.7432 | 1.60441 | 238.6712 | 0.06122 | 241.2286 | 2.00248 |
| 1.1    | 250.4647 | 0.99096 | 244.2753 | 0.92585 | 245.5552 | 1.57264 | 241.4087 | 0.01363 | 244.0257 | 2.08314 |
| 1.1125 | 253.256  | 1.04647 | 247.0145 | 0.93385 | 248.3362 | 1.55261 | 244.1187 | 0.04645 | 246.7844 | 2.14149 |
| 1.125  | 256.0364 | 1.10102 | 249.7177 | 0.93045 | 251.1057 | 1.5456  | 246.8186 | 0.07595 | 249.5233 | 2.17411 |
| 1.1375 | 258.8345 | 1.15325 | 252.4146 | 0.91315 | 253.8929 | 1.55572 | 249.5374 | 0.08674 | 252.2726 | 2.17493 |
| 1.15   | 261.6358 | 1.19867 | 255.095  | 0.87667 | 256.6837 | 1.58845 | 252.2659 | 0.07576 | 255.0206 | 2.14237 |
| 1.1625 | 264.3934 | 1.23443 | 257.7122 | 0.81793 | 259.4247 | 1.65105 | 254.9573 | 0.03899 | 257.7179 | 2.07619 |
| 1.175  | 267.1011 | 1.25956 | 260.2588 | 0.73764 | 262.1051 | 1.73998 | 257.5999 | 0.02424 | 260.3565 | 1.98165 |
| 1.1875 | 269.7836 | 1.27455 | 262.7658 | 0.64064 | 264.7506 | 1.84132 | 260.2151 | 0.09895 | 262.9592 | 1.86911 |
| 1.2    | 272.4692 | 1.27941 | 265.2664 | 0.53078 | 267.3872 | 1.94887 | 262.8282 | 0.18469 | 265.5519 | 1.74604 |
| 1.2125 | 275.1697 | 1.27411 | 267.778  | 0.40919 | 270.0268 | 2.06328 | 265.4505 | 0.27877 | 268.1453 | 1.61739 |
| 1.225  | 277.8456 | 1.26145 | 270.2647 | 0.27736 | 272.6333 | 2.18601 | 268.0444 | 0.38356 | 270.7014 | 1.48972 |
| 1.2375 | 280.4599 | 1.24333 | 272.6919 | 0.1415  | 275.1756 | 2.31515 | 270.5769 | 0.49809 | 273.1852 | 1.36832 |
| 1.25   | 283.0234 | 1.22302 | 275.0778 | 0.03245 | 277.6692 | 2.44032 | 273.0569 | 0.61864 | 275.6117 | 1.26484 |
| 1.2625 | 285.5511 | 1.20061 | 277.4493 | 0.11814 | 280.1341 | 2.55831 | 275.5003 | 0.74201 | 278.0072 | 1.18887 |
| 1.275  | 288.0522 | 1.1743  | 279.8242 | 0.24161 | 282.587  | 2.67123 | 277.9249 | 0.86393 | 280.3962 | 1.14539 |
| 1.2875 | 290.5152 | 1.14211 | 282.1932 | 0.36032 | 285.0178 | 2.77946 | 280.3211 | 0.9815  | 282.7742 | 1.14146 |
| 1.3    | 292.9024 | 1.10948 | 284.5157 | 0.46804 | 287.3854 | 2.87878 | 282.6442 | 1.09011 | 285.1004 | 1.17852 |
| 1.3125 | 295.2074 | 1.08226 | 286.7835 | 0.56161 | 289.6825 | 2.95858 | 284.8837 | 1.18531 | 287.3678 | 1.25829 |
| 1.325  | 297.4448 | 1.06092 | 289.0152 | 0.64032 | 291.9249 | 3.01392 | 287.0645 | 1.26501 | 289.5947 | 1.38319 |
| 1.3375 | 299.6156 | 1.04476 | 291.2107 | 0.70779 | 294.1101 | 3.0587  | 289.1974 | 1.33564 | 291.7851 | 1.54656 |
| 1.35   | 301.7079 | 1.03343 | 293.3591 | 0.76658 | 296.2266 | 3.1084  | 291.2784 | 1.40552 | 293.936  | 1.73885 |
| 1.3625 | 303.6842 | 1.02867 | 295.4233 | 0.81492 | 298.2371 | 3.16248 | 293.278  | 1.47162 | 296.0184 | 1.95301 |
| 1.375  | 305.5181 | 1.03042 | 297.3759 | 0.85223 | 300.1116 | 3.21083 | 295.1735 | 1.52231 | 298.0083 | 2.1827  |
| 1.3875 | 307.232  | 1.04418 | 299.2414 | 0.87823 | 301.8684 | 3.24159 | 296.9862 | 1.55142 | 299.9297 | 2.42135 |

1.4

308.8443

1.07896

301.0369

0.89268

303.5204

3.25326

298.7356

1.56065

301.7965

2.65743
