# Supplementary material for: Detection of DNA oligonucleotides with base mutations by terahertz spectroscopy and microstructures
Source: PubMed Central journal article supplement (PMC5783420; doi:10.1371/journal.pone.0191515), 2018-01-24
Supplement: pone.0191515.s002.pdf [file pone.0191515.s002.pdf]

Plotting Data of Fig. 3b

|        | 0.6 THz  | SD      | 0.8 THz  | SD      | 1.0 THz  | SD      | 1.2 THz  | SD      | 1.4 THz  | SD      |
|--------|----------|---------|----------|---------|----------|---------|----------|---------|----------|---------|
| Buffer | 156.9963 | 0.70669 | 187.6561 | 0.67409 | 227.799  | 0.73907 | 272.4692 | 1.27941 | 308.8443 | 1.07896 |
| Ter-5C | 151.907  | 0.3015  | 182.8478 | 1.16305 | 223.174  | 1.81799 | 267.3872 | 1.94887 | 303.5204 | 3.25326 |
| Ter-5G | 151.6095 | 0.95336 | 181.6707 | 0.87167 | 221.5971 | 1.27391 | 265.5519 | 1.74604 | 301.7965 | 2.65743 |
| Ter-5A | 150.5643 | 0.08453 | 180.7996 | 0.0072  | 221.4668 | 0.45755 | 265.2664 | 0.53078 | 301.0369 | 0.89268 |
| Ter-5T | 150.6561 | 0.64726 | 180.5254 | 0.84406 | 219.6049 | 0.60601 | 262.8282 | 0.18469 | 298.7356 | 1.56065 |
