# Supplementary material for: Detection of DNA oligonucleotides with base mutations by terahertz spectroscopy and microstructures
Source: PubMed Central journal article supplement (PMC5783420; doi:10.1371/journal.pone.0191515), 2018-01-24
Supplement: pone.0191515.s003.pdf [file pone.0191515.s003.pdf]

Plotting Data of Fig. 4

| Frequency (THz) | Absorption Coefficient( $\text{cm}^{-1}$ ) |         |                               |         |                             |         |                             |         |
|-----------------|--------------------------------------------|---------|-------------------------------|---------|-----------------------------|---------|-----------------------------|---------|
|                 | Buffer                                     | SD      | 0.2 $\mu\text{g}/\mu\text{L}$ | SD      | 1 $\mu\text{g}/\mu\text{L}$ | SD      | 5 $\mu\text{g}/\mu\text{L}$ | SD      |
| 0.6             | 156.3906                                   | 0.71792 | 151.31                        | 0.02232 | 150.2451                    | 0.72395 | 149.9835                    | 0.08195 |
| 0.60313         | 156.7919                                   | 0.71037 | 151.7541                      | 0.03371 | 150.6367                    | 0.7203  | 150.3681                    | 0.08377 |
| 0.60625         | 157.1969                                   | 0.70291 | 152.2009                      | 0.04486 | 151.0321                    | 0.71683 | 150.7564                    | 0.08544 |
| 0.60938         | 157.606                                    | 0.69555 | 152.6507                      | 0.05577 | 151.4319                    | 0.71353 | 151.1491                    | 0.08697 |
| 0.6125          | 158.0196                                   | 0.68831 | 153.104                       | 0.06641 | 151.8363                    | 0.71041 | 151.5463                    | 0.08836 |
| 0.61562         | 158.4373                                   | 0.68121 | 153.5604                      | 0.0768  | 152.245                     | 0.70746 | 151.9479                    | 0.08958 |
| 0.61875         | 158.8582                                   | 0.67425 | 154.0189                      | 0.08694 | 152.6573                    | 0.70471 | 152.353                     | 0.09064 |
| 0.62187         | 159.2811                                   | 0.66745 | 154.4784                      | 0.09683 | 153.0718                    | 0.70216 | 152.7601                    | 0.09153 |
| 0.625           | 159.7043                                   | 0.66083 | 154.9373                      | 0.10649 | 153.487                     | 0.69981 | 153.168                     | 0.09225 |
| 0.62813         | 160.1268                                   | 0.65438 | 155.3943                      | 0.11592 | 153.9017                    | 0.69765 | 153.5753                    | 0.09281 |
| 0.63125         | 160.5479                                   | 0.64812 | 155.8487                      | 0.12514 | 154.3152                    | 0.69569 | 153.9816                    | 0.09323 |
| 0.63438         | 160.9677                                   | 0.64206 | 156.3006                      | 0.13417 | 154.7275                    | 0.6939  | 154.3867                    | 0.09353 |
| 0.6375          | 161.3869                                   | 0.6362  | 156.7504                      | 0.14301 | 155.1394                    | 0.69229 | 154.7916                    | 0.09375 |
| 0.64063         | 161.8067                                   | 0.63055 | 157.1995                      | 0.15168 | 155.5519                    | 0.69083 | 155.1974                    | 0.0939  |
| 0.64375         | 162.2285                                   | 0.62511 | 157.649                       | 0.16019 | 155.9666                    | 0.68954 | 155.6056                    | 0.09403 |
| 0.64687         | 162.6537                                   | 0.61987 | 158.1004                      | 0.16853 | 156.3847                    | 0.68842 | 156.0177                    | 0.09414 |
| 0.65            | 163.0832                                   | 0.61485 | 158.5545                      | 0.17671 | 156.8072                    | 0.68746 | 156.4344                    | 0.09424 |
| 0.65312         | 163.5174                                   | 0.61005 | 159.0119                      | 0.18473 | 157.2345                    | 0.68668 | 156.8563                    | 0.09434 |
| 0.65625         | 163.9562                                   | 0.60548 | 159.4724                      | 0.19262 | 157.6666                    | 0.68606 | 157.2833                    | 0.09444 |
| 0.65938         | 164.3993                                   | 0.60114 | 159.9357                      | 0.20036 | 158.103                     | 0.68561 | 157.715                     | 0.09454 |
| 0.6625          | 164.8462                                   | 0.59705 | 160.4013                      | 0.208   | 158.5433                    | 0.68532 | 158.1509                    | 0.09464 |
| 0.66563         | 165.2965                                   | 0.59322 | 160.869                       | 0.21553 | 158.9872                    | 0.68517 | 158.5906                    | 0.09474 |
| 0.66875         | 165.75                                     | 0.58963 | 161.3387                      | 0.22298 | 159.4343                    | 0.68516 | 159.0339                    | 0.09482 |
| 0.67188         | 166.2069                                   | 0.58631 | 161.8105                      | 0.23037 | 159.8849                    | 0.6853  | 159.481                     | 0.09488 |
| 0.675           | 166.6674                                   | 0.58324 | 162.2849                      | 0.2377  | 160.3393                    | 0.68558 | 159.9321                    | 0.0949  |
| 0.67812         | 167.1318                                   | 0.58042 | 162.7623                      | 0.245   | 160.7978                    | 0.68602 | 160.3875                    | 0.09485 |
| 0.68125         | 167.6003                                   | 0.57787 | 163.2429                      | 0.25225 | 161.2606                    | 0.68662 | 160.8474                    | 0.09471 |
| 0.68437         | 168.0725                                   | 0.57559 | 163.7266                      | 0.25948 | 161.7274                    | 0.68739 | 161.3113                    | 0.09447 |
| 0.6875          | 168.5476                                   | 0.57357 | 164.2126                      | 0.2667  | 162.1975                    | 0.68832 | 161.7785                    | 0.09411 |
| 0.69063         | 169.0244                                   | 0.57183 | 164.6996                      | 0.27391 | 162.6696                    | 0.68941 | 162.2477                    | 0.09363 |
| 0.69375         | 169.5016                                   | 0.57037 | 165.1866                      | 0.28114 | 163.1424                    | 0.69067 | 162.7177                    | 0.09302 |
| 0.69688         | 169.9782                                   | 0.56917 | 165.6725                      | 0.28841 | 163.6148                    | 0.69208 | 163.1873                    | 0.09228 |
| 0.7             | 170.4535                                   | 0.56824 | 166.1567                      | 0.29575 | 164.0862                    | 0.69366 | 163.6559                    | 0.09143 |
| 0.70313         | 170.9274                                   | 0.56758 | 166.6392                      | 0.30316 | 164.5566                    | 0.69539 | 164.1235                    | 0.09045 |
| 0.70625         | 171.4006                                   | 0.56717 | 167.1207                      | 0.31067 | 165.0265                    | 0.69729 | 164.5906                    | 0.08934 |
| 0.70937         | 171.8742                                   | 0.56702 | 167.6023                      | 0.31828 | 165.497                     | 0.69934 | 165.0584                    | 0.08808 |
| 0.7125          | 172.3495                                   | 0.56713 | 168.0854                      | 0.326   | 165.9694                    | 0.70154 | 165.5281                    | 0.08667 |
| 0.71562         | 172.8281                                   | 0.56748 | 168.5715                      | 0.33382 | 166.4453                    | 0.7039  | 166.0014                    | 0.0851  |
| 0.71875         | 173.3109                                   | 0.56809 | 169.0618                      | 0.34174 | 166.9258                    | 0.70641 | 166.4792                    | 0.08337 |
| 0.72188         | 173.7987                                   | 0.56894 | 169.557                       | 0.34977 | 167.4115                    | 0.70906 | 166.9622                    | 0.08149 |
| 0.725           | 174.2915                                   | 0.57004 | 170.057                       | 0.3579  | 167.9025                    | 0.71185 | 167.4506                    | 0.07945 |
| 0.72813         | 174.7889                                   | 0.57137 | 170.5616                      | 0.36615 | 168.3983                    | 0.71478 | 167.9438                    | 0.07728 |
| 0.73125         | 175.2902                                   | 0.57295 | 171.0702                      | 0.37453 | 168.8984                    | 0.71782 | 168.4412                    | 0.07498 |
| 0.73438         | 175.7947                                   | 0.57476 | 171.5821                      | 0.38304 | 169.4022                    | 0.72098 | 168.9422                    | 0.07257 |
| 0.7375          | 176.3022                                   | 0.57682 | 172.0971                      | 0.3917  | 169.9091                    | 0.72424 | 169.4464                    | 0.07003 |
| 0.74062         | 176.8125                                   | 0.57914 | 172.6152                      | 0.40052 | 170.4193                    | 0.72759 | 169.9537                    | 0.06739 |
| 0.74375         | 177.3257                                   | 0.58171 | 173.1364                      | 0.40951 | 170.9327                    | 0.731   | 170.4641                    | 0.06464 |
| 0.74687         | 177.8418                                   | 0.58454 | 173.6612                      | 0.41866 | 171.4495                    | 0.73448 | 170.9779                    | 0.06179 |
| 0.75            | 178.3609                                   | 0.58761 | 174.1895                      | 0.42798 | 171.9698                    | 0.73802 | 171.4949                    | 0.05884 |

|         |          |         |          |         |          |         |          |          |
|---------|----------|---------|----------|---------|----------|---------|----------|----------|
| 0.75313 | 178.8827 | 0.59093 | 174.7211 | 0.43749 | 172.4932 | 0.7416  | 172.0149 | 0.05581  |
| 0.75625 | 179.4065 | 0.59447 | 175.2555 | 0.44718 | 173.0192 | 0.74523 | 172.5373 | 0.05272  |
| 0.75938 | 179.9316 | 0.59821 | 175.7918 | 0.45706 | 173.5469 | 0.74889 | 173.0613 | 0.0496   |
| 0.7625  | 180.4568 | 0.60216 | 176.3291 | 0.46714 | 174.0752 | 0.75259 | 173.5857 | 0.04646  |
| 0.76563 | 180.9814 | 0.6063  | 176.8664 | 0.47745 | 174.6033 | 0.7563  | 174.1098 | 0.04332  |
| 0.76875 | 181.5046 | 0.61063 | 177.4032 | 0.48798 | 175.1304 | 0.76003 | 174.6329 | 0.04021  |
| 0.77187 | 182.0266 | 0.61517 | 177.9392 | 0.49874 | 175.6566 | 0.76375 | 175.1549 | 0.03712  |
| 0.775   | 182.5478 | 0.61991 | 178.4751 | 0.50973 | 176.1823 | 0.76746 | 175.6764 | 0.03406  |
| 0.77812 | 183.0694 | 0.62484 | 179.0119 | 0.52095 | 176.7085 | 0.77116 | 176.1985 | 0.03103  |
| 0.78125 | 183.5926 | 0.62998 | 179.5509 | 0.5324  | 177.2366 | 0.77485 | 176.7226 | 0.02803  |
| 0.78438 | 184.119  | 0.6353  | 180.0936 | 0.54406 | 177.7681 | 0.77853 | 177.25   | 0.02507  |
| 0.7875  | 184.6497 | 0.64081 | 180.6413 | 0.55592 | 178.3041 | 0.78219 | 177.782  | 0.02214  |
| 0.79063 | 185.1856 | 0.64649 | 181.1946 | 0.56797 | 178.8455 | 0.78583 | 178.3194 | 0.01926  |
| 0.79375 | 185.7267 | 0.65235 | 181.7539 | 0.5802  | 179.3924 | 0.78943 | 178.8623 | 0.01643  |
| 0.79688 | 186.2727 | 0.65836 | 182.3186 | 0.5926  | 179.9443 | 0.79296 | 179.4103 | 0.01367  |
| 0.8     | 186.8229 | 0.66453 | 182.888  | 0.60518 | 180.5007 | 0.7964  | 179.9626 | 0.01099  |
| 0.80312 | 187.3765 | 0.67084 | 183.4615 | 0.61793 | 181.0607 | 0.79971 | 180.5186 | 0.0084   |
| 0.80625 | 187.933  | 0.67725 | 184.0385 | 0.63085 | 181.6237 | 0.80288 | 181.0776 | 0.0059   |
| 0.80937 | 188.4921 | 0.68375 | 184.6186 | 0.64394 | 182.1896 | 0.80592 | 181.6394 | 0.0035   |
| 0.8125  | 189.0536 | 0.69031 | 185.2018 | 0.65719 | 182.7581 | 0.80884 | 182.2038 | 0.00121  |
| 0.81563 | 189.6175 | 0.69692 | 185.788  | 0.67059 | 183.3293 | 0.81166 | 182.7708 | 9.81E-04 |
| 0.81875 | 190.1837 | 0.70356 | 186.3772 | 0.68412 | 183.9031 | 0.81438 | 183.3402 | 0.00306  |
| 0.82188 | 190.7519 | 0.71024 | 186.969  | 0.69777 | 184.4792 | 0.81702 | 183.9119 | 0.00503  |
| 0.825   | 191.3219 | 0.71695 | 187.5631 | 0.71152 | 185.0573 | 0.81958 | 184.4854 | 0.00688  |
| 0.82813 | 191.8929 | 0.72367 | 188.1587 | 0.72535 | 185.6367 | 0.82204 | 185.0602 | 0.00863  |
| 0.83125 | 192.4642 | 0.7304  | 188.7549 | 0.73925 | 186.2166 | 0.82438 | 185.6355 | 0.01026  |
| 0.83437 | 193.0352 | 0.7371  | 189.3511 | 0.75321 | 186.7964 | 0.8266  | 186.2107 | 0.01177  |
| 0.8375  | 193.6053 | 0.74375 | 189.9466 | 0.76721 | 187.3754 | 0.82868 | 186.7854 | 0.01315  |
| 0.84062 | 194.1747 | 0.75033 | 190.5414 | 0.78127 | 187.9538 | 0.83059 | 187.3596 | 0.01439  |
| 0.84375 | 194.7438 | 0.75682 | 191.1358 | 0.79536 | 188.5318 | 0.83234 | 187.9336 | 0.01551  |
| 0.84688 | 195.3135 | 0.76321 | 191.7308 | 0.8095  | 189.1104 | 0.83392 | 188.5086 | 0.01649  |
| 0.85    | 195.8851 | 0.76949 | 192.3276 | 0.82367 | 189.6909 | 0.8353  | 189.0857 | 0.01735  |
| 0.85313 | 196.4601 | 0.77568 | 192.9275 | 0.83788 | 190.2745 | 0.83649 | 189.6663 | 0.01807  |
| 0.85625 | 197.0396 | 0.78175 | 193.5317 | 0.85211 | 190.8626 | 0.83748 | 190.2516 | 0.01862  |
| 0.85938 | 197.6247 | 0.7877  | 194.1411 | 0.86637 | 191.4559 | 0.83825 | 190.8426 | 0.01895  |
| 0.8625  | 198.2155 | 0.79349 | 194.7558 | 0.88065 | 192.0548 | 0.8388  | 191.4394 | 0.019    |
| 0.86562 | 198.812  | 0.79909 | 195.3756 | 0.89495 | 192.659  | 0.83911 | 192.0421 | 0.0187   |
| 0.86875 | 199.4134 | 0.80448 | 195.9996 | 0.90926 | 193.2678 | 0.83916 | 192.6498 | 0.01797  |
| 0.87187 | 200.019  | 0.80962 | 196.6271 | 0.92361 | 193.8805 | 0.83892 | 193.2619 | 0.01675  |
| 0.875   | 200.628  | 0.8145  | 197.2571 | 0.93798 | 194.4962 | 0.83836 | 193.8777 | 0.015    |
| 0.87813 | 201.2399 | 0.8191  | 197.8891 | 0.95238 | 195.1145 | 0.83746 | 194.4967 | 0.01268  |
| 0.88125 | 201.8543 | 0.82341 | 198.5227 | 0.96681 | 195.7349 | 0.83621 | 195.1185 | 0.0098   |
| 0.88438 | 202.4711 | 0.82741 | 199.1576 | 0.98128 | 196.3573 | 0.8346  | 195.7429 | 0.00635  |
| 0.8875  | 203.0901 | 0.83108 | 199.7939 | 0.99577 | 196.9815 | 0.83261 | 196.3699 | 0.00233  |
| 0.89063 | 203.7112 | 0.83439 | 200.4311 | 1.01028 | 197.6073 | 0.83025 | 196.9991 | 0.00228  |
| 0.89375 | 204.3339 | 0.8373  | 201.0689 | 1.02481 | 198.2342 | 0.82752 | 197.6303 | 0.00749  |
| 0.89687 | 204.9578 | 0.8398  | 201.7068 | 1.03936 | 198.862  | 0.82442 | 198.263  | 0.0133   |
| 0.9     | 205.5824 | 0.84187 | 202.3441 | 1.05391 | 199.4899 | 0.82094 | 198.8967 | 0.01972  |
| 0.90312 | 206.2073 | 0.84351 | 202.9804 | 1.06845 | 200.1175 | 0.81711 | 199.5309 | 0.02674  |
| 0.90625 | 206.8321 | 0.84475 | 203.6152 | 1.08298 | 200.7444 | 0.81292 | 200.1652 | 0.03432  |
| 0.90938 | 207.457  | 0.8456  | 204.2485 | 1.09749 | 201.3707 | 0.80841 | 200.7997 | 0.04242  |
| 0.9125  | 208.0823 | 0.84608 | 204.8807 | 1.11195 | 201.9966 | 0.80359 | 201.4347 | 0.05098  |
| 0.91563 | 208.7088 | 0.84618 | 205.5126 | 1.12636 | 202.6229 | 0.79852 | 202.071  | 0.05995  |
| 0.91875 | 209.3377 | 0.84589 | 206.1453 | 1.14069 | 203.2509 | 0.7932  | 202.7095 | 0.0693   |

|         |          |         |          |         |          |         |          |         |
|---------|----------|---------|----------|---------|----------|---------|----------|---------|
| 0.92188 | 209.9701 | 0.84521 | 206.7801 | 1.15495 | 203.8816 | 0.78765 | 203.3517 | 0.07898 |
| 0.925   | 210.6073 | 0.84411 | 207.4183 | 1.16912 | 204.5163 | 0.78187 | 203.9986 | 0.08901 |
| 0.92812 | 211.2501 | 0.84259 | 208.0606 | 1.18321 | 205.1558 | 0.77585 | 204.6511 | 0.09938 |
| 0.93125 | 211.8989 | 0.84064 | 208.7073 | 1.19721 | 205.8005 | 0.76957 | 205.3096 | 0.11014 |
| 0.93437 | 212.5534 | 0.83828 | 209.3583 | 1.2111  | 206.4501 | 0.763   | 205.9738 | 0.1213  |
| 0.9375  | 213.213  | 0.83553 | 210.0128 | 1.22489 | 207.1041 | 0.75613 | 206.6433 | 0.13291 |
| 0.94063 | 213.8769 | 0.83242 | 210.6698 | 1.23854 | 207.7615 | 0.74896 | 207.3172 | 0.14497 |
| 0.94375 | 214.544  | 0.82899 | 211.3284 | 1.25205 | 208.4213 | 0.74151 | 207.9944 | 0.15747 |
| 0.94688 | 215.2135 | 0.82525 | 211.9877 | 1.2654  | 209.0829 | 0.73378 | 208.6742 | 0.17039 |
| 0.95    | 215.8849 | 0.82123 | 212.6473 | 1.27858 | 209.7457 | 0.72582 | 209.356  | 0.18367 |
| 0.95313 | 216.5577 | 0.81695 | 213.3068 | 1.29159 | 210.4092 | 0.71765 | 210.0395 | 0.19728 |
| 0.95625 | 217.2317 | 0.81246 | 213.966  | 1.30443 | 211.0733 | 0.70931 | 210.7243 | 0.21116 |
| 0.95937 | 217.9066 | 0.80778 | 214.6246 | 1.3171  | 211.7376 | 0.70082 | 211.4102 | 0.22526 |
| 0.9625  | 218.5822 | 0.80294 | 215.2824 | 1.3296  | 212.4019 | 0.6922  | 212.0969 | 0.23954 |
| 0.96562 | 219.2581 | 0.79797 | 215.939  | 1.34191 | 213.0658 | 0.68346 | 212.7841 | 0.25398 |
| 0.96875 | 219.934  | 0.79291 | 216.594  | 1.35406 | 213.7289 | 0.6746  | 213.4713 | 0.26856 |
| 0.97188 | 220.6098 | 0.78776 | 217.2473 | 1.36602 | 214.391  | 0.66562 | 214.1585 | 0.2833  |
| 0.975   | 221.2852 | 0.78255 | 217.8985 | 1.3778  | 215.052  | 0.65651 | 214.8455 | 0.29822 |
| 0.97813 | 221.9605 | 0.7773  | 218.5479 | 1.38942 | 215.7118 | 0.64729 | 215.5323 | 0.31337 |
| 0.98125 | 222.6359 | 0.77206 | 219.1958 | 1.40087 | 216.3709 | 0.63797 | 216.2195 | 0.32879 |
| 0.98438 | 223.3123 | 0.76687 | 219.8428 | 1.41218 | 217.03   | 0.62861 | 216.9075 | 0.34453 |
| 0.9875  | 223.9906 | 0.76181 | 220.49   | 1.42335 | 217.6898 | 0.61928 | 217.5974 | 0.36063 |
| 0.99062 | 224.6719 | 0.75693 | 221.1384 | 1.43438 | 218.3516 | 0.61006 | 218.2903 | 0.37714 |
| 0.99375 | 225.3574 | 0.75231 | 221.7893 | 1.44527 | 219.0163 | 0.60107 | 218.987  | 0.3941  |
| 0.99687 | 226.0479 | 0.74799 | 222.4434 | 1.456   | 219.6849 | 0.59243 | 219.6886 | 0.41153 |
| 1       | 226.7436 | 0.74401 | 223.1012 | 1.46655 | 220.3577 | 0.58423 | 220.3952 | 0.42945 |
| 1.00313 | 227.4445 | 0.74042 | 223.7625 | 1.47692 | 221.0345 | 0.57659 | 221.1069 | 0.44786 |
| 1.00625 | 228.1497 | 0.73726 | 224.4267 | 1.48707 | 221.7148 | 0.56959 | 221.8229 | 0.46677 |
| 1.00938 | 228.8582 | 0.73458 | 225.093  | 1.49701 | 222.3977 | 0.56329 | 222.5423 | 0.48613 |
| 1.0125  | 229.5689 | 0.73245 | 225.7603 | 1.50672 | 223.0821 | 0.55775 | 223.2641 | 0.50588 |
| 1.01563 | 230.2807 | 0.73095 | 226.4278 | 1.5162  | 223.7671 | 0.55301 | 223.9872 | 0.52592 |
| 1.01875 | 230.9928 | 0.73017 | 227.0949 | 1.52545 | 224.4518 | 0.5491  | 224.7107 | 0.54615 |
| 1.02188 | 231.7047 | 0.73019 | 227.7612 | 1.53446 | 225.1358 | 0.54603 | 225.4339 | 0.56641 |
| 1.025   | 232.4157 | 0.73106 | 228.4264 | 1.54323 | 225.8186 | 0.54383 | 226.1561 | 0.58657 |
| 1.02812 | 233.1256 | 0.73281 | 229.0906 | 1.55174 | 226.4999 | 0.5425  | 226.877  | 0.60651 |
| 1.03125 | 233.8342 | 0.73546 | 229.7537 | 1.55998 | 227.1797 | 0.54203 | 227.5962 | 0.62613 |
| 1.03438 | 234.5413 | 0.73899 | 230.4156 | 1.56793 | 227.8577 | 0.54241 | 228.3134 | 0.64537 |
| 1.0375  | 235.2468 | 0.74341 | 231.0765 | 1.57561 | 228.5339 | 0.54363 | 229.0285 | 0.66419 |
| 1.04063 | 235.9507 | 0.74872 | 231.7363 | 1.58299 | 229.2084 | 0.54564 | 229.7415 | 0.68255 |
| 1.04375 | 236.653  | 0.75492 | 232.3951 | 1.59008 | 229.8812 | 0.54841 | 230.4523 | 0.70042 |
| 1.04688 | 237.3541 | 0.76202 | 233.0531 | 1.59689 | 230.5525 | 0.55186 | 231.1611 | 0.71774 |
| 1.05    | 238.0541 | 0.77    | 233.7107 | 1.60344 | 231.2226 | 0.55593 | 231.8683 | 0.73448 |
| 1.05313 | 238.7538 | 0.77881 | 234.3685 | 1.60974 | 231.8921 | 0.56055 | 232.5744 | 0.75063 |
| 1.05625 | 239.454  | 0.78838 | 235.0275 | 1.61583 | 232.5619 | 0.56565 | 233.2801 | 0.76619 |
| 1.05937 | 240.1554 | 0.79864 | 235.6885 | 1.62171 | 233.2328 | 0.57117 | 233.9865 | 0.78117 |
| 1.0625  | 240.8592 | 0.80951 | 236.3526 | 1.62742 | 233.9058 | 0.57705 | 234.6943 | 0.79561 |
| 1.06563 | 241.5658 | 0.82093 | 237.0203 | 1.63298 | 234.5815 | 0.58326 | 235.4044 | 0.80955 |
| 1.06875 | 242.2757 | 0.83285 | 237.6921 | 1.6384  | 235.2603 | 0.58974 | 236.1171 | 0.82301 |
| 1.07188 | 242.9888 | 0.84526 | 238.3677 | 1.64369 | 235.9422 | 0.59645 | 236.8322 | 0.83599 |
| 1.075   | 243.7045 | 0.85812 | 239.0465 | 1.64885 | 236.6264 | 0.60331 | 237.5494 | 0.84846 |
| 1.07813 | 244.4218 | 0.87142 | 239.7277 | 1.65387 | 237.3121 | 0.61025 | 238.2674 | 0.86035 |
| 1.08125 | 245.1397 | 0.88508 | 240.4102 | 1.65875 | 237.9984 | 0.61717 | 238.9853 | 0.87158 |
| 1.08438 | 245.857  | 0.89904 | 241.0932 | 1.66349 | 238.6842 | 0.62396 | 239.7018 | 0.88204 |
| 1.0875  | 246.5729 | 0.91318 | 241.7759 | 1.66813 | 239.3686 | 0.63049 | 240.4159 | 0.89163 |

|          |           |          |           |          |           |          |           |          |
|----------|-----------|----------|-----------|----------|-----------|----------|-----------|----------|
| 1. 09062 | 247. 2865 | 0. 9274  | 242. 4581 | 1. 6727  | 240. 051  | 0. 63666 | 241. 1268 | 0. 90025 |
| 1. 09375 | 247. 9976 | 0. 94163 | 243. 1394 | 1. 67725 | 240. 7309 | 0. 64237 | 241. 834  | 0. 90786 |
| 1. 09688 | 248. 706  | 0. 95582 | 243. 8199 | 1. 68182 | 241. 4083 | 0. 64758 | 242. 5371 | 0. 91443 |
| 1. 1     | 249. 4118 | 0. 96994 | 244. 4996 | 1. 68644 | 242. 0832 | 0. 65222 | 243. 2363 | 0. 91997 |
| 1. 10313 | 250. 1152 | 0. 98399 | 245. 1787 | 1. 69112 | 242. 7557 | 0. 65628 | 243. 9314 | 0. 9245  |
| 1. 10625 | 250. 8164 | 0. 99799 | 245. 8572 | 1. 69584 | 243. 4259 | 0. 65975 | 244. 6228 | 0. 9281  |
| 1. 10938 | 251. 5155 | 1. 01192 | 246. 5353 | 1. 7006  | 244. 0941 | 0. 66262 | 245. 3106 | 0. 93081 |
| 1. 1125  | 252. 2129 | 1. 0258  | 247. 2131 | 1. 70539 | 244. 7604 | 0. 66491 | 245. 995  | 0. 93273 |
| 1. 11563 | 252. 9089 | 1. 03962 | 247. 891  | 1. 71021 | 245. 4254 | 0. 66664 | 246. 6763 | 0. 93392 |
| 1. 11875 | 253. 6039 | 1. 05337 | 248. 5692 | 1. 71505 | 246. 0892 | 0. 66781 | 247. 3551 | 0. 93444 |
| 1. 12187 | 254. 2983 | 1. 06707 | 249. 2484 | 1. 71995 | 246. 7526 | 0. 66841 | 248. 0317 | 0. 93432 |
| 1. 125   | 254. 9926 | 1. 08072 | 249. 9292 | 1. 72491 | 247. 4161 | 0. 66841 | 248. 7067 | 0. 93353 |
| 1. 12813 | 255. 6876 | 1. 09431 | 250. 6124 | 1. 72995 | 248. 0804 | 0. 66774 | 249. 3808 | 0. 93203 |
| 1. 13125 | 256. 3838 | 1. 10783 | 251. 2986 | 1. 73507 | 248. 7463 | 0. 6663  | 250. 0546 | 0. 92972 |
| 1. 13438 | 257. 0817 | 1. 12121 | 251. 9885 | 1. 74028 | 249. 4143 | 0. 66402 | 250. 7286 | 0. 92652 |
| 1. 1375  | 257. 7815 | 1. 13438 | 252. 6824 | 1. 74557 | 250. 0849 | 0. 66081 | 251. 403  | 0. 92231 |
| 1. 14063 | 258. 483  | 1. 14725 | 253. 3803 | 1. 75095 | 250. 7579 | 0. 6566  | 252. 0777 | 0. 91701 |
| 1. 14375 | 259. 1855 | 1. 1597  | 254. 0816 | 1. 75644 | 251. 433  | 0. 65135 | 252. 7522 | 0. 91051 |
| 1. 14688 | 259. 8881 | 1. 17166 | 254. 7857 | 1. 76205 | 252. 1092 | 0. 64506 | 253. 4256 | 0. 90276 |
| 1. 15    | 260. 5896 | 1. 18306 | 255. 4914 | 1. 7678  | 252. 7857 | 0. 63772 | 254. 0969 | 0. 8937  |
| 1. 15312 | 261. 2891 | 1. 19388 | 256. 1978 | 1. 77374 | 253. 4612 | 0. 62934 | 254. 7651 | 0. 88328 |
| 1. 15625 | 261. 9857 | 1. 20408 | 256. 9039 | 1. 77987 | 254. 135  | 0. 61995 | 255. 4293 | 0. 87147 |
| 1. 15938 | 262. 6788 | 1. 21367 | 257. 6092 | 1. 7862  | 254. 8064 | 0. 60957 | 256. 0887 | 0. 85823 |
| 1. 1625  | 263. 3683 | 1. 22263 | 258. 3132 | 1. 79274 | 255. 4751 | 0. 59823 | 256. 7431 | 0. 84355 |
| 1. 16563 | 264. 054  | 1. 23094 | 259. 0158 | 1. 79946 | 256. 1409 | 0. 586   | 257. 3924 | 0. 82741 |
| 1. 16875 | 264. 7362 | 1. 23859 | 259. 7171 | 1. 80635 | 256. 804  | 0. 57297 | 258. 0368 | 0. 80985 |
| 1. 17188 | 265. 4152 | 1. 24555 | 260. 4172 | 1. 81339 | 257. 4649 | 0. 55929 | 258. 6766 | 0. 79093 |
| 1. 175   | 266. 0916 | 1. 25182 | 261. 1163 | 1. 82056 | 258. 1237 | 0. 54512 | 259. 3125 | 0. 77073 |
| 1. 17813 | 266. 7657 | 1. 25741 | 261. 8146 | 1. 82784 | 258. 781  | 0. 53068 | 259. 9451 | 0. 74936 |
| 1. 18125 | 267. 438  | 1. 26234 | 262. 5121 | 1. 83523 | 259. 4372 | 0. 51617 | 260. 575  | 0. 72693 |
| 1. 18437 | 268. 109  | 1. 26666 | 263. 2089 | 1. 84272 | 260. 0925 | 0. 50181 | 261. 2028 | 0. 70352 |
| 1. 1875  | 268. 7791 | 1. 2704  | 263. 9052 | 1. 85031 | 260. 7472 | 0. 48779 | 261. 8289 | 0. 6792  |
| 1. 19063 | 269. 4487 | 1. 27357 | 264. 6011 | 1. 85801 | 261. 4017 | 0. 47431 | 262. 4538 | 0. 65403 |
| 1. 19375 | 270. 1182 | 1. 27615 | 265. 297  | 1. 86582 | 262. 0564 | 0. 46158 | 263. 0781 | 0. 62804 |
| 1. 19688 | 270. 7883 | 1. 27808 | 265. 9934 | 1. 87375 | 262. 7117 | 0. 4498  | 263. 7023 | 0. 60129 |
| 1. 2     | 271. 4592 | 1. 27932 | 266. 6907 | 1. 88177 | 263. 3681 | 0. 43915 | 264. 3268 | 0. 57381 |
| 1. 20313 | 272. 1315 | 1. 27984 | 267. 3894 | 1. 88988 | 264. 0262 | 0. 42981 | 264. 9524 | 0. 5456  |
| 1. 20625 | 272. 8054 | 1. 27966 | 268. 0897 | 1. 89803 | 264. 6863 | 0. 42195 | 265. 5792 | 0. 51667 |
| 1. 20938 | 273. 4806 | 1. 27883 | 268. 7915 | 1. 90619 | 265. 3482 | 0. 41575 | 266. 2073 | 0. 48702 |
| 1. 2125  | 274. 1567 | 1. 27741 | 269. 4944 | 1. 91432 | 266. 0116 | 0. 4114  | 266. 8361 | 0. 45662 |
| 1. 21563 | 274. 8329 | 1. 2755  | 270. 1975 | 1. 9224  | 266. 6756 | 0. 40914 | 267. 4649 | 0. 42547 |
| 1. 21875 | 275. 508  | 1. 27314 | 270. 9    | 1. 93041 | 267. 3395 | 0. 4092  | 268. 0927 | 0. 3936  |
| 1. 22188 | 276. 181  | 1. 27038 | 271. 6007 | 1. 93835 | 268. 002  | 0. 41182 | 268. 7183 | 0. 36106 |
| 1. 225   | 276. 8509 | 1. 26721 | 272. 2989 | 1. 94623 | 268. 6623 | 0. 4172  | 269. 3409 | 0. 32796 |
| 1. 22813 | 277. 5169 | 1. 26363 | 272. 9939 | 1. 95403 | 269. 3197 | 0. 42548 | 269. 9596 | 0. 29442 |
| 1. 23125 | 278. 1786 | 1. 25965 | 273. 6853 | 1. 96174 | 269. 9737 | 0. 43669 | 270. 574  | 0. 26055 |
| 1. 23438 | 278. 8359 | 1. 2553  | 274. 3729 | 1. 96932 | 270. 6241 | 0. 45078 | 271. 1842 | 0. 2265  |
| 1. 2375  | 279. 4891 | 1. 25067 | 275. 0569 | 1. 97674 | 271. 2712 | 0. 46759 | 271. 7904 | 0. 19239 |
| 1. 24063 | 280. 1384 | 1. 24584 | 275. 7373 | 1. 98392 | 271. 9153 | 0. 48692 | 272. 3932 | 0. 15834 |
| 1. 24375 | 280. 7845 | 1. 2409  | 276. 4143 | 1. 99081 | 272. 5568 | 0. 50848 | 272. 9931 | 0. 12445 |
| 1. 24688 | 281. 4277 | 1. 2359  | 277. 0882 | 1. 99735 | 273. 1961 | 0. 53198 | 273. 5908 | 0. 09082 |
| 1. 25    | 282. 0684 | 1. 23084 | 277. 7591 | 2. 0035  | 273. 8337 | 0. 55708 | 274. 1868 | 0. 05752 |
| 1. 25313 | 282. 7066 | 1. 22571 | 278. 4273 | 2. 00925 | 274. 4697 | 0. 58341 | 274. 7814 | 0. 02463 |
| 1. 25625 | 283. 3425 | 1. 22046 | 279. 0929 | 2. 0146  | 275. 1044 | 0. 61064 | 275. 3751 | 0. 00782 |

|          |           |          |           |          |           |          |           |          |
|----------|-----------|----------|-----------|----------|-----------|----------|-----------|----------|
| 1. 25938 | 283. 9762 | 1. 21505 | 279. 7562 | 2. 01958 | 275. 738  | 0. 63844 | 275. 968  | 0. 03981 |
| 1. 2625  | 284. 6079 | 1. 20946 | 280. 4176 | 2. 02418 | 276. 3708 | 0. 66654 | 276. 5605 | 0. 0714  |
| 1. 26563 | 285. 2378 | 1. 2037  | 281. 0775 | 2. 02843 | 277. 0029 | 0. 69475 | 277. 1528 | 0. 10268 |
| 1. 26875 | 285. 8659 | 1. 19774 | 281. 7362 | 2. 0323  | 277. 6347 | 0. 72292 | 277. 7454 | 0. 13375 |
| 1. 27188 | 286. 4926 | 1. 19155 | 282. 394  | 2. 03581 | 278. 2665 | 0. 75094 | 278. 3385 | 0. 16472 |
| 1. 275   | 287. 118  | 1. 18506 | 283. 0512 | 2. 03894 | 278. 8983 | 0. 77872 | 278. 9323 | 0. 19562 |
| 1. 27813 | 287. 742  | 1. 17819 | 283. 7076 | 2. 0417  | 279. 53   | 0. 80615 | 279. 5267 | 0. 22642 |
| 1. 28125 | 288. 3643 | 1. 17087 | 284. 3628 | 2. 0441  | 280. 1614 | 0. 83308 | 280. 1215 | 0. 25705 |
| 1. 28438 | 288. 9842 | 1. 1631  | 285. 0161 | 2. 04615 | 280. 7914 | 0. 85937 | 280. 7161 | 0. 28735 |
| 1. 2875  | 289. 601  | 1. 1549  | 285. 6665 | 2. 04785 | 281. 4193 | 0. 88485 | 281. 3094 | 0. 31718 |
| 1. 29063 | 290. 2137 | 1. 14642 | 286. 3129 | 2. 0492  | 282. 0438 | 0. 9094  | 281. 9007 | 0. 34641 |
| 1. 29375 | 290. 8217 | 1. 13782 | 286. 9542 | 2. 05018 | 282. 6641 | 0. 93293 | 282. 4891 | 0. 37495 |
| 1. 29688 | 291. 4242 | 1. 1293  | 287. 5898 | 2. 05075 | 283. 2792 | 0. 95542 | 283. 0737 | 0. 40273 |
| 1. 3     | 292. 0211 | 1. 12101 | 288. 219  | 2. 05089 | 283. 889  | 0. 9769  | 283. 6544 | 0. 4297  |
| 1. 30313 | 292. 6123 | 1. 11306 | 288. 8418 | 2. 05056 | 284. 4933 | 0. 99742 | 284. 2311 | 0. 45584 |
| 1. 30625 | 293. 1979 | 1. 10551 | 289. 458  | 2. 04972 | 285. 0923 | 1. 01702 | 284. 8039 | 0. 48112 |
| 1. 30938 | 293. 7785 | 1. 09834 | 290. 068  | 2. 04836 | 285. 6864 | 1. 03571 | 285. 3732 | 0. 50549 |
| 1. 3125  | 294. 3543 | 1. 09155 | 290. 6719 | 2. 04649 | 286. 2762 | 1. 0535  | 285. 9397 | 0. 52892 |
| 1. 31563 | 294. 9257 | 1. 08512 | 291. 2702 | 2. 04412 | 286. 862  | 1. 07035 | 286. 5036 | 0. 55137 |
| 1. 31875 | 295. 4931 | 1. 07904 | 291. 8629 | 2. 04129 | 287. 4442 | 1. 08627 | 287. 0655 | 0. 57283 |
| 1. 32188 | 296. 0564 | 1. 07332 | 292. 4504 | 2. 03804 | 288. 0231 | 1. 10127 | 287. 6254 | 0. 59332 |
| 1. 325   | 296. 6158 | 1. 068   | 293. 0328 | 2. 03441 | 288. 5986 | 1. 11542 | 288. 1834 | 0. 6129  |
| 1. 32813 | 297. 1712 | 1. 06305 | 293. 61   | 2. 03046 | 289. 1709 | 1. 12882 | 288. 7394 | 0. 63165 |
| 1. 33125 | 297. 7226 | 1. 05846 | 294. 1824 | 2. 02626 | 289. 7399 | 1. 14158 | 289. 2932 | 0. 64967 |
| 1. 33438 | 298. 2697 | 1. 05418 | 294. 7502 | 2. 02186 | 290. 3058 | 1. 1538  | 289. 8446 | 0. 66705 |
| 1. 3375  | 298. 8125 | 1. 05017 | 295. 3138 | 2. 01731 | 290. 8686 | 1. 16557 | 290. 3936 | 0. 68386 |
| 1. 34063 | 299. 351  | 1. 0464  | 295. 8735 | 2. 01262 | 291. 4287 | 1. 17695 | 290. 9401 | 0. 70014 |
| 1. 34375 | 299. 8849 | 1. 04287 | 296. 4295 | 2. 0078  | 291. 9859 | 1. 188   | 291. 484  | 0. 71593 |
| 1. 34688 | 300. 4141 | 1. 03962 | 296. 9817 | 2. 00284 | 292. 5403 | 1. 19876 | 292. 0252 | 0. 73121 |
| 1. 35    | 300. 9381 | 1. 03672 | 297. 5299 | 1. 99774 | 293. 0915 | 1. 20929 | 292. 5631 | 0. 74597 |
| 1. 35313 | 301. 456  | 1. 03422 | 298. 0732 | 1. 99247 | 293. 6387 | 1. 21967 | 293. 0972 | 0. 76015 |
| 1. 35625 | 301. 9671 | 1. 03218 | 298. 6107 | 1. 98703 | 294. 1813 | 1. 22994 | 293. 6264 | 0. 77369 |
| 1. 35938 | 302. 4704 | 1. 0306  | 299. 1413 | 1. 98145 | 294. 7182 | 1. 24011 | 294. 1498 | 0. 78652 |
| 1. 3625  | 302. 9652 | 1. 02945 | 299. 664  | 1. 97572 | 295. 2485 | 1. 25017 | 294. 6666 | 0. 79861 |
| 1. 36563 | 303. 4508 | 1. 0287  | 300. 178  | 1. 96983 | 295. 7717 | 1. 26007 | 295. 1761 | 0. 80995 |
| 1. 36875 | 303. 927  | 1. 0283  | 300. 6828 | 1. 96375 | 296. 2874 | 1. 26976 | 295. 678  | 0. 82058 |
| 1. 37188 | 304. 3938 | 1. 02823 | 301. 1783 | 1. 95744 | 296. 7955 | 1. 27916 | 296. 1724 | 0. 83054 |
| 1. 375   | 304. 8516 | 1. 02855 | 301. 6645 | 1. 95081 | 297. 2962 | 1. 28818 | 296. 6598 | 0. 83987 |
| 1. 37813 | 305. 301  | 1. 02934 | 302. 1419 | 1. 94383 | 297. 7902 | 1. 29672 | 297. 1408 | 0. 84856 |
| 1. 38125 | 305. 7426 | 1. 03077 | 302. 6106 | 1. 93645 | 298. 2781 | 1. 30467 | 297. 6163 | 0. 85659 |
| 1. 38438 | 306. 1773 | 1. 03302 | 303. 0712 | 1. 92867 | 298. 7604 | 1. 31194 | 298. 0867 | 0. 8639  |
| 1. 3875  | 306. 6054 | 1. 03626 | 303. 524  | 1. 92056 | 299. 2376 | 1. 31842 | 298. 5528 | 0. 87043 |
| 1. 39063 | 307. 0272 | 1. 04067 | 303. 9691 | 1. 91217 | 299. 71   | 1. 32402 | 299. 0146 | 0. 87616 |
| 1. 39375 | 307. 4429 | 1. 04636 | 304. 4068 | 1. 90357 | 300. 1776 | 1. 32872 | 299. 4723 | 0. 88108 |
| 1. 39688 | 307. 8524 | 1. 05345 | 304. 837  | 1. 89481 | 300. 6404 | 1. 33253 | 299. 9258 | 0. 88527 |
| 1. 4     | 308. 2556 | 1. 06202 | 305. 2599 | 1. 8859  | 301. 0984 | 1. 33552 | 300. 3749 | 0. 88879 |
