# Supplementary material for: Detection of DNA oligonucleotides with base mutations by terahertz spectroscopy and microstructures
Source: PubMed Central journal article supplement (PMC5783420; doi:10.1371/journal.pone.0191515), 2018-01-24
Supplement: pone.0191515.s004.pdf [file pone.0191515.s004.pdf]

Plotting Data of Fig. 5

| Frequency (THz) | Transmission |           |          |           |          |           |          |           |          |           |
|-----------------|--------------|-----------|----------|-----------|----------|-----------|----------|-----------|----------|-----------|
|                 | Ter-5A       | SD        | Ter-5C   | SD        | Ter-5T   | SD        | Ter-5G   | SD        | SRRs     | SD        |
| 1. 22089        | 0. 1545      | 0. 003323 | 0. 19828 | 0. 001961 | 0. 16603 | 0. 002461 | 0. 18715 | 0. 002086 | 0. 21848 | 0. 002204 |
| 1. 22209        | 0. 15339     | 0. 003275 | 0. 1972  | 0. 00195  | 0. 16471 | 0. 002429 | 0. 1861  | 0. 002062 | 0. 21745 | 0. 002204 |
| 1. 22329        | 0. 15232     | 0. 00323  | 0. 1961  | 0. 00194  | 0. 16342 | 0. 0024   | 0. 18506 | 0. 00204  | 0. 21639 | 0. 002206 |
| 1. 22449        | 0. 15129     | 0. 003188 | 0. 19497 | 0. 001933 | 0. 16216 | 0. 002373 | 0. 184   | 0. 00202  | 0. 21529 | 0. 00221  |
| 1. 22569        | 0. 1503      | 0. 003151 | 0. 19383 | 0. 001926 | 0. 16091 | 0. 002349 | 0. 18294 | 0. 002002 | 0. 21416 | 0. 002215 |
| 1. 22689        | 0. 14934     | 0. 003116 | 0. 19265 | 0. 001921 | 0. 1597  | 0. 002327 | 0. 18188 | 0. 001987 | 0. 213   | 0. 00222  |
| 1. 22809        | 0. 14841     | 0. 003085 | 0. 19146 | 0. 001916 | 0. 1585  | 0. 002308 | 0. 1808  | 0. 001973 | 0. 2118  | 0. 002224 |
| 1. 22929        | 0. 14752     | 0. 003057 | 0. 19025 | 0. 001912 | 0. 15734 | 0. 002291 | 0. 17973 | 0. 001962 | 0. 21058 | 0. 002228 |
| 1. 23049        | 0. 14666     | 0. 003033 | 0. 18901 | 0. 001908 | 0. 15619 | 0. 002277 | 0. 17865 | 0. 001952 | 0. 20933 | 0. 002232 |
| 1. 23169        | 0. 14583     | 0. 003011 | 0. 18776 | 0. 001905 | 0. 15506 | 0. 002264 | 0. 17756 | 0. 001944 | 0. 20805 | 0. 002236 |
| 1. 23289        | 0. 14503     | 0. 002991 | 0. 18649 | 0. 001902 | 0. 15396 | 0. 002253 | 0. 17647 | 0. 001938 | 0. 20674 | 0. 002239 |
| 1. 23409        | 0. 14425     | 0. 002974 | 0. 1852  | 0. 001899 | 0. 15288 | 0. 002244 | 0. 17538 | 0. 001933 | 0. 20541 | 0. 002241 |
| 1. 23529        | 0. 14351     | 0. 002958 | 0. 1839  | 0. 001896 | 0. 15181 | 0. 002236 | 0. 17428 | 0. 001929 | 0. 20405 | 0. 002243 |
| 1. 23649        | 0. 14279     | 0. 002945 | 0. 18258 | 0. 001893 | 0. 15077 | 0. 002229 | 0. 17318 | 0. 001926 | 0. 20266 | 0. 002243 |
| 1. 2377         | 0. 14209     | 0. 002932 | 0. 18124 | 0. 00189  | 0. 14975 | 0. 002223 | 0. 17207 | 0. 001923 | 0. 20126 | 0. 002243 |
| 1. 2389         | 0. 14142     | 0. 002922 | 0. 17989 | 0. 001887 | 0. 14874 | 0. 002219 | 0. 17097 | 0. 001922 | 0. 19983 | 0. 002242 |
| 1. 2401         | 0. 14076     | 0. 002912 | 0. 17853 | 0. 001883 | 0. 14775 | 0. 002215 | 0. 16986 | 0. 001921 | 0. 19838 | 0. 00224  |
| 1. 2413         | 0. 14013     | 0. 002903 | 0. 17715 | 0. 001879 | 0. 14678 | 0. 002211 | 0. 16874 | 0. 001921 | 0. 19691 | 0. 002237 |
| 1. 2425         | 0. 13952     | 0. 002894 | 0. 17576 | 0. 001874 | 0. 14583 | 0. 002208 | 0. 16763 | 0. 00192  | 0. 19542 | 0. 002233 |
| 1. 2437         | 0. 13892     | 0. 002887 | 0. 17437 | 0. 001869 | 0. 14489 | 0. 002205 | 0. 16651 | 0. 00192  | 0. 19391 | 0. 002228 |
| 1. 2449         | 0. 13835     | 0. 002879 | 0. 17296 | 0. 001863 | 0. 14397 | 0. 002202 | 0. 16539 | 0. 00192  | 0. 19238 | 0. 002222 |
| 1. 2461         | 0. 13778     | 0. 00287  | 0. 17154 | 0. 001856 | 0. 14306 | 0. 002198 | 0. 16427 | 0. 001919 | 0. 19083 | 0. 002214 |
| 1. 2473         | 0. 13723     | 0. 002862 | 0. 17012 | 0. 001849 | 0. 14217 | 0. 002195 | 0. 16314 | 0. 001918 | 0. 18927 | 0. 002205 |
| 1. 2485         | 0. 1367      | 0. 002853 | 0. 16868 | 0. 00184  | 0. 14129 | 0. 002191 | 0. 16202 | 0. 001916 | 0. 1877  | 0. 002195 |
| 1. 2497         | 0. 13617     | 0. 002843 | 0. 16724 | 0. 001831 | 0. 14042 | 0. 002185 | 0. 16089 | 0. 001913 | 0. 18611 | 0. 002184 |
| 1. 2509         | 0. 13566     | 0. 002831 | 0. 1658  | 0. 00182  | 0. 13957 | 0. 002179 | 0. 15977 | 0. 00191  | 0. 18451 | 0. 00217  |
| 1. 2521         | 0. 13515     | 0. 002818 | 0. 16435 | 0. 001808 | 0. 13873 | 0. 002172 | 0. 15864 | 0. 001905 | 0. 18289 | 0. 002156 |
| 1. 2533         | 0. 13462     | 0. 002804 | 0. 16289 | 0. 001795 | 0. 1379  | 0. 002164 | 0. 15752 | 0. 0019   | 0. 18126 | 0. 00214  |
| 1. 2545         | 0. 13407     | 0. 002788 | 0. 16143 | 0. 001781 | 0. 13708 | 0. 002153 | 0. 15639 | 0. 001892 | 0. 17963 | 0. 002123 |
| 1. 2557         | 0. 13352     | 0. 00277  | 0. 15997 | 0. 001766 | 0. 13627 | 0. 002141 | 0. 15526 | 0. 001883 | 0. 17798 | 0. 002104 |
| 1. 2569         | 0. 13296     | 0. 002749 | 0. 15851 | 0. 001749 | 0. 13547 | 0. 002128 | 0. 15414 | 0. 001873 | 0. 17632 | 0. 002084 |

|          |          |           |          |           |          |           |          |           |          |           |
|----------|----------|-----------|----------|-----------|----------|-----------|----------|-----------|----------|-----------|
| 1. 2581  | 0. 13239 | 0. 002726 | 0. 15705 | 0. 001731 | 0. 13468 | 0. 002113 | 0. 15301 | 0. 001861 | 0. 17466 | 0. 002061 |
| 1. 2593  | 0. 13181 | 0. 0027   | 0. 15558 | 0. 00171  | 0. 1339  | 0. 002095 | 0. 15189 | 0. 001846 | 0. 17299 | 0. 002037 |
| 1. 2605  | 0. 13122 | 0. 00267  | 0. 15412 | 0. 001688 | 0. 13313 | 0. 002074 | 0. 15077 | 0. 001829 | 0. 17132 | 0. 002011 |
| 1. 2617  | 0. 13061 | 0. 002638 | 0. 15266 | 0. 001665 | 0. 13229 | 0. 002052 | 0. 14964 | 0. 001811 | 0. 16964 | 0. 001984 |
| 1. 26291 | 0. 12999 | 0. 002601 | 0. 1512  | 0. 00164  | 0. 13144 | 0. 002026 | 0. 14853 | 0. 001789 | 0. 16795 | 0. 001954 |
| 1. 26411 | 0. 12936 | 0. 002561 | 0. 14974 | 0. 001613 | 0. 13059 | 0. 001997 | 0. 14741 | 0. 001765 | 0. 16626 | 0. 001922 |
| 1. 26531 | 0. 12872 | 0. 002518 | 0. 14829 | 0. 001584 | 0. 12972 | 0. 001966 | 0. 14629 | 0. 001738 | 0. 16457 | 0. 001888 |
| 1. 26651 | 0. 12807 | 0. 002469 | 0. 14684 | 0. 001552 | 0. 12885 | 0. 001931 | 0. 14521 | 0. 001708 | 0. 16288 | 0. 001852 |
| 1. 26771 | 0. 1274  | 0. 002417 | 0. 1454  | 0. 001519 | 0. 12797 | 0. 001893 | 0. 14412 | 0. 001675 | 0. 16119 | 0. 001814 |
| 1. 26891 | 0. 12672 | 0. 002359 | 0. 14397 | 0. 001483 | 0. 12709 | 0. 001851 | 0. 14302 | 0. 001639 | 0. 1595  | 0. 001774 |
| 1. 27011 | 0. 12603 | 0. 002297 | 0. 14254 | 0. 001444 | 0. 1262  | 0. 001805 | 0. 14192 | 0. 001599 | 0. 15781 | 0. 001731 |
| 1. 27131 | 0. 12533 | 0. 002229 | 0. 14112 | 0. 001403 | 0. 1253  | 0. 001756 | 0. 14081 | 0. 001556 | 0. 15612 | 0. 001686 |
| 1. 27251 | 0. 12462 | 0. 002156 | 0. 13971 | 0. 001359 | 0. 1244  | 0. 001702 | 0. 1397  | 0. 001509 | 0. 15444 | 0. 001637 |
| 1. 27371 | 0. 12391 | 0. 002077 | 0. 13831 | 0. 001312 | 0. 1235  | 0. 001644 | 0. 13858 | 0. 001458 | 0. 15276 | 0. 001587 |
| 1. 27491 | 0. 12319 | 0. 001992 | 0. 13692 | 0. 001262 | 0. 1226  | 0. 001581 | 0. 13746 | 0. 001403 | 0. 15109 | 0. 001534 |
| 1. 27611 | 0. 12247 | 0. 001901 | 0. 13555 | 0. 001209 | 0. 1217  | 0. 001514 | 0. 13634 | 0. 001344 | 0. 14942 | 0. 001478 |
| 1. 27731 | 0. 12174 | 0. 001804 | 0. 13438 | 0. 001154 | 0. 1208  | 0. 001443 | 0. 13521 | 0. 001281 | 0. 14776 | 0. 001419 |
| 1. 27851 | 0. 12102 | 0. 001703 | 0. 13322 | 0. 001096 | 0. 1199  | 0. 001368 | 0. 13409 | 0. 001216 | 0. 14637 | 0. 001359 |
| 1. 27971 | 0. 12029 | 0. 001596 | 0. 13205 | 0. 001036 | 0. 11901 | 0. 00129  | 0. 13296 | 0. 001147 | 0. 14498 | 0. 001297 |
| 1. 28091 | 0. 11957 | 0. 001487 | 0. 13089 | 0. 000975 | 0. 11812 | 0. 00121  | 0. 13184 | 0. 001076 | 0. 14358 | 0. 001233 |
| 1. 28211 | 0. 11886 | 0. 001375 | 0. 12972 | 0. 000912 | 0. 11724 | 0. 001128 | 0. 13072 | 0. 001004 | 0. 14217 | 0. 001169 |
| 1. 28331 | 0. 11815 | 0. 001259 | 0. 12854 | 0. 000849 | 0. 11638 | 0. 001044 | 0. 1296  | 0. 00093  | 0. 14076 | 0. 001104 |
| 1. 28451 | 0. 11745 | 0. 001143 | 0. 12737 | 0. 000786 | 0. 11552 | 0. 000959 | 0. 12849 | 0. 000856 | 0. 13933 | 0. 001038 |
| 1. 28571 | 0. 11677 | 0. 001026 | 0. 12621 | 0. 000723 | 0. 11468 | 0. 000875 | 0. 12739 | 0. 000782 | 0. 1379  | 0. 000973 |
| 1. 28691 | 0. 1161  | 0. 000909 | 0. 12504 | 0. 000661 | 0. 11386 | 0. 000791 | 0. 12629 | 0. 000709 | 0. 13645 | 0. 000908 |
| 1. 28812 | 0. 11544 | 0. 000791 | 0. 12388 | 0. 0006   | 0. 11305 | 0. 000708 | 0. 1252  | 0. 000636 | 0. 135   | 0. 000844 |
| 1. 28932 | 0. 11481 | 0. 000676 | 0. 12273 | 0. 000541 | 0. 11227 | 0. 000628 | 0. 12412 | 0. 000566 | 0. 13355 | 0. 000782 |
| 1. 29052 | 0. 1142  | 0. 000562 | 0. 12159 | 0. 000485 | 0. 11151 | 0. 000552 | 0. 12306 | 0. 0005   | 0. 13209 | 0. 000722 |
| 1. 29172 | 0. 11361 | 0. 00045  | 0. 12047 | 0. 000432 | 0. 11077 | 0. 000479 | 0. 12201 | 0. 000437 | 0. 13063 | 0. 000663 |
| 1. 29292 | 0. 11304 | 0. 000342 | 0. 11937 | 0. 000383 | 0. 11006 | 0. 000414 | 0. 12097 | 0. 00038  | 0. 12918 | 0. 000608 |
| 1. 29412 | 0. 11251 | 0. 000236 | 0. 11828 | 0. 000339 | 0. 10938 | 0. 000356 | 0. 11996 | 0. 000329 | 0. 12773 | 0. 000554 |
| 1. 29532 | 0. 112   | 0. 000137 | 0. 11722 | 0. 000302 | 0. 10873 | 0. 000309 | 0. 11896 | 0. 000288 | 0. 1263  | 0. 000505 |
| 1. 29652 | 0. 11153 | 4. 09E-05 | 0. 11618 | 0. 000272 | 0. 10811 | 0. 000277 | 0. 11798 | 0. 000258 | 0. 12488 | 0. 00046  |
| 1. 29772 | 0. 11109 | 4. 87E-05 | 0. 11517 | 0. 000251 | 0. 10753 | 0. 000263 | 0. 11703 | 0. 000242 | 0. 12348 | 0. 000419 |
| 1. 29892 | 0. 11069 | 0. 00013  | 0. 11419 | 0. 000239 | 0. 10698 | 0. 000264 | 0. 1161  | 0. 000239 | 0. 1221  | 0. 000383 |

|          |          |           |          |           |          |           |          |           |          |           |
|----------|----------|-----------|----------|-----------|----------|-----------|----------|-----------|----------|-----------|
| 1. 30012 | 0. 11033 | 0. 000207 | 0. 11324 | 0. 000236 | 0. 10648 | 0. 000278 | 0. 1152  | 0. 000248 | 0. 12074 | 0. 000352 |
| 1. 30132 | 0. 11001 | 0. 000275 | 0. 11233 | 0. 00024  | 0. 10601 | 0. 0003   | 0. 11433 | 0. 000264 | 0. 11941 | 0. 000328 |
| 1. 30252 | 0. 10974 | 0. 000336 | 0. 11144 | 0. 00025  | 0. 10559 | 0. 000325 | 0. 11349 | 0. 000283 | 0. 1181  | 0. 00031  |
| 1. 30372 | 0. 1095  | 0. 000392 | 0. 11059 | 0. 000266 | 0. 10521 | 0. 000353 | 0. 11267 | 0. 000306 | 0. 11682 | 0. 000298 |
| 1. 30492 | 0. 10932 | 0. 000443 | 0. 10978 | 0. 000284 | 0. 10488 | 0. 00038  | 0. 11189 | 0. 000328 | 0. 11557 | 0. 000294 |
| 1. 30612 | 0. 10918 | 0. 00049  | 0. 109   | 0. 000306 | 0. 10459 | 0. 000408 | 0. 11115 | 0. 000351 | 0. 11434 | 0. 000298 |
| 1. 30732 | 0. 10909 | 0. 000533 | 0. 10825 | 0. 00033  | 0. 10436 | 0. 000433 | 0. 11044 | 0. 000373 | 0. 11315 | 0. 000307 |
| 1. 30852 | 0. 10905 | 0. 000576 | 0. 10755 | 0. 000355 | 0. 10417 | 0. 000459 | 0. 10976 | 0. 000395 | 0. 11199 | 0. 000322 |
| 1. 30972 | 0. 10906 | 0. 000617 | 0. 10688 | 0. 000381 | 0. 10403 | 0. 000484 | 0. 10913 | 0. 000417 | 0. 11087 | 0. 000342 |
| 1. 31092 | 0. 10912 | 0. 000658 | 0. 10625 | 0. 000409 | 0. 10394 | 0. 00051  | 0. 10853 | 0. 000438 | 0. 10978 | 0. 000366 |
| 1. 31212 | 0. 10924 | 0. 000699 | 0. 10566 | 0. 000436 | 0. 1039  | 0. 000535 | 0. 10797 | 0. 000458 | 0. 10873 | 0. 000392 |
| 1. 31333 | 0. 10941 | 0. 000742 | 0. 1051  | 0. 000464 | 0. 1039  | 0. 000562 | 0. 10746 | 0. 000479 | 0. 10771 | 0. 000421 |
| 1. 31453 | 0. 10964 | 0. 000788 | 0. 10459 | 0. 000492 | 0. 10396 | 0. 00059  | 0. 10699 | 0. 0005   | 0. 10673 | 0. 000451 |
| 1. 31573 | 0. 10992 | 0. 000835 | 0. 10412 | 0. 00052  | 0. 10407 | 0. 000619 | 0. 10656 | 0. 000522 | 0. 10579 | 0. 000483 |
| 1. 31693 | 0. 11025 | 0. 000884 | 0. 10368 | 0. 000548 | 0. 10422 | 0. 000649 | 0. 10617 | 0. 000544 | 0. 10488 | 0. 000516 |
| 1. 31813 | 0. 11064 | 0. 000933 | 0. 10329 | 0. 000576 | 0. 10443 | 0. 00068  | 0. 10582 | 0. 000567 | 0. 10402 | 0. 00055  |
| 1. 31933 | 0. 11107 | 0. 000985 | 0. 10294 | 0. 000605 | 0. 10468 | 0. 000713 | 0. 10553 | 0. 000591 | 0. 1032  | 0. 000584 |
| 1. 32053 | 0. 11156 | 0. 001038 | 0. 10263 | 0. 000634 | 0. 10497 | 0. 000746 | 0. 10527 | 0. 000616 | 0. 10242 | 0. 00062  |
| 1. 32173 | 0. 1121  | 0. 001091 | 0. 10236 | 0. 000662 | 0. 10531 | 0. 000781 | 0. 10506 | 0. 000642 | 0. 10169 | 0. 000655 |
| 1. 32293 | 0. 11268 | 0. 001146 | 0. 10213 | 0. 000691 | 0. 1057  | 0. 000816 | 0. 1049  | 0. 000669 | 0. 10099 | 0. 000691 |
| 1. 32413 | 0. 1133  | 0. 001201 | 0. 10194 | 0. 00072  | 0. 10613 | 0. 000853 | 0. 10478 | 0. 000698 | 0. 10034 | 0. 000727 |
| 1. 32533 | 0. 11397 | 0. 001256 | 0. 10179 | 0. 00075  | 0. 10659 | 0. 00089  | 0. 10471 | 0. 000727 | 0. 09974 | 0. 000763 |
| 1. 32653 | 0. 11468 | 0. 001312 | 0. 10168 | 0. 00078  | 0. 1071  | 0. 000929 | 0. 10469 | 0. 000758 | 0. 09918 | 0. 0008   |
| 1. 32773 | 0. 11542 | 0. 001368 | 0. 10162 | 0. 00081  | 0. 10764 | 0. 000968 | 0. 1047  | 0. 00079  | 0. 09866 | 0. 000837 |
| 1. 32893 | 0. 1162  | 0. 001424 | 0. 10159 | 0. 00084  | 0. 10822 | 0. 001007 | 0. 10477 | 0. 000824 | 0. 0982  | 0. 000874 |
| 1. 33013 | 0. 11701 | 0. 001479 | 0. 1016  | 0. 00087  | 0. 10884 | 0. 001046 | 0. 10487 | 0. 000857 | 0. 09777 | 0. 000911 |
| 1. 33133 | 0. 11785 | 0. 001535 | 0. 10165 | 0. 000901 | 0. 10948 | 0. 001086 | 0. 10502 | 0. 000892 | 0. 09739 | 0. 000948 |
| 1. 33253 | 0. 11871 | 0. 001591 | 0. 10174 | 0. 000932 | 0. 11016 | 0. 001127 | 0. 10521 | 0. 000928 | 0. 09706 | 0. 000985 |
| 1. 33373 | 0. 11959 | 0. 001645 | 0. 10187 | 0. 000962 | 0. 11087 | 0. 001167 | 0. 10545 | 0. 000964 | 0. 09678 | 0. 001021 |
| 1. 33493 | 0. 12049 | 0. 001699 | 0. 10204 | 0. 000993 | 0. 1116  | 0. 001206 | 0. 10572 | 0. 001    | 0. 09654 | 0. 001057 |
| 1. 33613 | 0. 12141 | 0. 001751 | 0. 10225 | 0. 001023 | 0. 11236 | 0. 001246 | 0. 10603 | 0. 001037 | 0. 09635 | 0. 001093 |
| 1. 33733 | 0. 12234 | 0. 001803 | 0. 10249 | 0. 001053 | 0. 11315 | 0. 001285 | 0. 10638 | 0. 001074 | 0. 0962  | 0. 001128 |
| 1. 33854 | 0. 12327 | 0. 001853 | 0. 10277 | 0. 001083 | 0. 11396 | 0. 001323 | 0. 10676 | 0. 00111  | 0. 0961  | 0. 001163 |
| 1. 33974 | 0. 12421 | 0. 001903 | 0. 10308 | 0. 001113 | 0. 11479 | 0. 001361 | 0. 10718 | 0. 001147 | 0. 09604 | 0. 001197 |
| 1. 34094 | 0. 12516 | 0. 00195  | 0. 10343 | 0. 001142 | 0. 11564 | 0. 001398 | 0. 10763 | 0. 001183 | 0. 09603 | 0. 001231 |

|          |          |           |          |           |          |           |          |           |          |           |
|----------|----------|-----------|----------|-----------|----------|-----------|----------|-----------|----------|-----------|
| 1. 34214 | 0. 12611 | 0. 001995 | 0. 10382 | 0. 00117  | 0. 11652 | 0. 001433 | 0. 10811 | 0. 001219 | 0. 09607 | 0. 001263 |
| 1. 34334 | 0. 12705 | 0. 002039 | 0. 10424 | 0. 001197 | 0. 11741 | 0. 001468 | 0. 10861 | 0. 001254 | 0. 09615 | 0. 001294 |
| 1. 34454 | 0. 128   | 0. 00208  | 0. 1047  | 0. 001224 | 0. 11832 | 0. 001502 | 0. 10913 | 0. 001288 | 0. 09627 | 0. 001325 |
| 1. 34574 | 0. 12894 | 0. 002121 | 0. 10519 | 0. 00125  | 0. 11925 | 0. 001534 | 0. 10968 | 0. 001321 | 0. 09644 | 0. 001354 |
| 1. 34694 | 0. 12988 | 0. 002157 | 0. 10571 | 0. 001274 | 0. 1202  | 0. 001564 | 0. 11025 | 0. 001353 | 0. 09665 | 0. 001382 |
| 1. 34814 | 0. 13081 | 0. 002192 | 0. 10627 | 0. 001297 | 0. 12116 | 0. 001593 | 0. 11084 | 0. 001383 | 0. 09691 | 0. 001408 |
| 1. 34934 | 0. 13173 | 0. 002223 | 0. 10686 | 0. 001319 | 0. 12214 | 0. 001619 | 0. 11144 | 0. 001412 | 0. 0972  | 0. 001433 |
| 1. 35054 | 0. 13265 | 0. 002253 | 0. 10749 | 0. 001339 | 0. 12313 | 0. 001644 | 0. 11205 | 0. 001439 | 0. 09754 | 0. 001457 |
| 1. 35174 | 0. 13356 | 0. 002278 | 0. 10815 | 0. 001358 | 0. 12414 | 0. 001666 | 0. 11267 | 0. 001464 | 0. 09792 | 0. 001478 |
| 1. 35294 | 0. 13447 | 0. 0023   | 0. 10884 | 0. 001374 | 0. 12516 | 0. 001686 | 0. 11331 | 0. 001487 | 0. 09833 | 0. 001498 |
| 1. 35414 | 0. 13536 | 0. 00232  | 0. 10957 | 0. 001389 | 0. 1262  | 0. 001704 | 0. 11395 | 0. 001508 | 0. 09879 | 0. 001516 |
| 1. 35534 | 0. 13625 | 0. 002336 | 0. 11033 | 0. 001402 | 0. 12724 | 0. 001719 | 0. 11461 | 0. 001526 | 0. 09928 | 0. 001532 |
| 1. 35654 | 0. 13713 | 0. 002348 | 0. 11112 | 0. 001412 | 0. 1283  | 0. 001731 | 0. 11526 | 0. 001542 | 0. 09981 | 0. 001545 |
| 1. 35774 | 0. 138   | 0. 002356 | 0. 11194 | 0. 00142  | 0. 12937 | 0. 00174  | 0. 11593 | 0. 001555 | 0. 10037 | 0. 001556 |
| 1. 35894 | 0. 13887 | 0. 00236  | 0. 1128  | 0. 001425 | 0. 13045 | 0. 001746 | 0. 1166  | 0. 001564 | 0. 10097 | 0. 001565 |
| 1. 36014 | 0. 13973 | 0. 00236  | 0. 11369 | 0. 001428 | 0. 13154 | 0. 001749 | 0. 11728 | 0. 001571 | 0. 1016  | 0. 001571 |
| 1. 36134 | 0. 14059 | 0. 002356 | 0. 11461 | 0. 001428 | 0. 13264 | 0. 001748 | 0. 11796 | 0. 001575 | 0. 10226 | 0. 001574 |
| 1. 36255 | 0. 14144 | 0. 002348 | 0. 11556 | 0. 001425 | 0. 13375 | 0. 001745 | 0. 11864 | 0. 001575 | 0. 10296 | 0. 001575 |
| 1. 36375 | 0. 14229 | 0. 002334 | 0. 11654 | 0. 001419 | 0. 13487 | 0. 001737 | 0. 11934 | 0. 001571 | 0. 10368 | 0. 001573 |
| 1. 36495 | 0. 14314 | 0. 002317 | 0. 11756 | 0. 001411 | 0. 136   | 0. 001727 | 0. 12004 | 0. 001565 | 0. 10443 | 0. 001569 |
| 1. 36615 | 0. 14399 | 0. 002296 | 0. 1186  | 0. 0014   | 0. 13713 | 0. 001713 | 0. 12075 | 0. 001555 | 0. 10521 | 0. 001562 |
| 1. 36735 | 0. 14484 | 0. 002272 | 0. 11968 | 0. 001387 | 0. 13827 | 0. 001697 | 0. 12147 | 0. 001544 | 0. 10602 | 0. 001553 |
| 1. 36855 | 0. 1457  | 0. 002245 | 0. 12079 | 0. 001372 | 0. 13941 | 0. 001679 | 0. 1222  | 0. 001529 | 0. 10685 | 0. 001543 |
| 1. 36975 | 0. 14655 | 0. 002216 | 0. 12192 | 0. 001356 | 0. 14056 | 0. 001659 | 0. 12294 | 0. 001514 | 0. 10771 | 0. 001531 |
| 1. 37095 | 0. 14741 | 0. 002186 | 0. 12308 | 0. 001339 | 0. 14172 | 0. 001638 | 0. 1237  | 0. 001497 | 0. 1086  | 0. 001519 |
| 1. 37215 | 0. 14828 | 0. 002154 | 0. 12427 | 0. 001321 | 0. 14288 | 0. 001616 | 0. 12447 | 0. 001479 | 0. 10951 | 0. 001506 |
| 1. 37335 | 0. 14916 | 0. 002121 | 0. 12548 | 0. 001303 | 0. 14404 | 0. 001594 | 0. 12526 | 0. 00146  | 0. 11045 | 0. 001492 |
| 1. 37455 | 0. 15004 | 0. 002089 | 0. 12672 | 0. 001285 | 0. 14521 | 0. 001571 | 0. 12607 | 0. 001442 | 0. 1113  | 0. 001479 |
| 1. 37575 | 0. 15093 | 0. 002057 | 0. 12782 | 0. 001268 | 0. 14638 | 0. 001549 | 0. 1269  | 0. 001424 | 0. 11218 | 0. 001466 |
| 1. 37695 | 0. 15183 | 0. 002025 | 0. 12895 | 0. 001251 | 0. 14756 | 0. 001528 | 0. 12774 | 0. 001406 | 0. 11308 | 0. 001454 |
| 1. 37815 | 0. 15273 | 0. 001996 | 0. 13009 | 0. 001236 | 0. 14875 | 0. 001507 | 0. 12861 | 0. 00139  | 0. 11401 | 0. 001443 |
| 1. 37935 | 0. 15365 | 0. 001967 | 0. 13124 | 0. 001222 | 0. 14994 | 0. 001489 | 0. 1295  | 0. 001376 | 0. 11497 | 0. 001433 |
| 1. 38055 | 0. 15459 | 0. 001941 | 0. 13242 | 0. 00121  | 0. 15113 | 0. 001471 | 0. 13041 | 0. 001362 | 0. 11595 | 0. 001425 |
| 1. 38175 | 0. 15553 | 0. 001918 | 0. 13362 | 0. 0012   | 0. 15233 | 0. 001457 | 0. 13134 | 0. 001352 | 0. 11695 | 0. 001418 |
| 1. 38295 | 0. 15648 | 0. 001897 | 0. 13483 | 0. 001192 | 0. 15354 | 0. 001444 | 0. 13229 | 0. 001344 | 0. 11798 | 0. 001414 |

|          |          |           |          |           |          |           |          |           |          |           |
|----------|----------|-----------|----------|-----------|----------|-----------|----------|-----------|----------|-----------|
| 1. 38415 | 0. 15745 | 0. 001882 | 0. 13606 | 0. 001188 | 0. 15475 | 0. 001436 | 0. 13327 | 0. 001339 | 0. 11903 | 0. 001412 |
| 1. 38535 | 0. 15844 | 0. 00187  | 0. 13731 | 0. 001187 | 0. 15597 | 0. 00143  | 0. 13426 | 0. 001338 | 0. 1201  | 0. 001413 |
| 1. 38655 | 0. 15943 | 0. 001863 | 0. 13858 | 0. 00119  | 0. 15719 | 0. 001429 | 0. 13519 | 0. 001341 | 0. 1212  | 0. 001418 |
| 1. 38776 | 0. 16044 | 0. 00186  | 0. 13986 | 0. 001196 | 0. 15842 | 0. 001431 | 0. 13614 | 0. 001348 | 0. 12233 | 0. 001425 |
| 1. 38896 | 0. 16147 | 0. 001864 | 0. 14117 | 0. 001207 | 0. 15966 | 0. 001439 | 0. 13711 | 0. 00136  | 0. 12347 | 0. 001437 |
| 1. 39016 | 0. 16251 | 0. 001873 | 0. 14249 | 0. 001222 | 0. 1609  | 0. 001451 | 0. 13809 | 0. 001376 | 0. 12465 | 0. 001451 |
| 1. 39136 | 0. 16356 | 0. 001886 | 0. 14382 | 0. 00124  | 0. 16214 | 0. 001465 | 0. 13909 | 0. 001396 | 0. 12584 | 0. 001469 |
| 1. 39256 | 0. 16463 | 0. 001902 | 0. 14518 | 0. 001261 | 0. 16339 | 0. 001483 | 0. 1401  | 0. 001419 | 0. 12706 | 0. 001489 |
| 1. 39376 | 0. 16572 | 0. 00192  | 0. 14655 | 0. 001284 | 0. 16464 | 0. 001503 | 0. 14113 | 0. 001444 | 0. 1283  | 0. 001511 |
| 1. 39496 | 0. 16682 | 0. 001942 | 0. 14794 | 0. 001309 | 0. 16589 | 0. 001526 | 0. 14218 | 0. 001471 | 0. 12957 | 0. 001534 |
| 1. 39616 | 0. 16793 | 0. 001964 | 0. 14934 | 0. 001335 | 0. 16715 | 0. 001549 | 0. 14325 | 0. 0015   | 0. 13086 | 0. 001558 |
| 1. 39736 | 0. 16906 | 0. 001988 | 0. 15076 | 0. 001362 | 0. 16842 | 0. 001573 | 0. 14433 | 0. 001529 | 0. 13217 | 0. 001583 |
| 1. 39856 | 0. 1702  | 0. 002011 | 0. 1522  | 0. 001389 | 0. 16968 | 0. 001597 | 0. 14543 | 0. 001559 | 0. 13351 | 0. 001608 |
| 1. 39976 | 0. 17145 | 0. 002035 | 0. 15365 | 0. 001417 | 0. 17096 | 0. 001622 | 0. 14655 | 0. 001589 | 0. 13487 | 0. 001633 |
| 1. 40096 | 0. 17271 | 0. 002056 | 0. 15512 | 0. 001443 | 0. 17223 | 0. 001645 | 0. 14769 | 0. 001618 | 0. 13625 | 0. 001658 |
| 1. 40216 | 0. 17397 | 0. 002076 | 0. 15661 | 0. 001468 | 0. 17351 | 0. 001667 | 0. 14884 | 0. 001646 | 0. 13766 | 0. 001681 |
| 1. 40336 | 0. 17523 | 0. 002093 | 0. 15811 | 0. 00149  | 0. 17479 | 0. 001686 | 0. 15002 | 0. 001672 | 0. 13908 | 0. 001702 |
| 1. 40456 | 0. 17649 | 0. 002107 | 0. 15963 | 0. 001511 | 0. 17607 | 0. 001704 | 0. 15121 | 0. 001695 | 0. 14053 | 0. 001721 |
| 1. 40576 | 0. 17775 | 0. 002117 | 0. 16116 | 0. 001529 | 0. 17735 | 0. 001718 | 0. 15242 | 0. 001716 | 0. 14201 | 0. 001737 |
| 1. 40696 | 0. 17902 | 0. 002123 | 0. 16271 | 0. 001543 | 0. 17864 | 0. 001728 | 0. 15365 | 0. 001733 | 0. 14351 | 0. 001751 |
| 1. 40816 | 0. 18028 | 0. 002124 | 0. 16427 | 0. 001553 | 0. 17992 | 0. 001735 | 0. 1549  | 0. 001747 | 0. 14502 | 0. 001761 |
| 1. 40936 | 0. 18153 | 0. 002117 | 0. 16584 | 0. 001559 | 0. 18121 | 0. 001736 | 0. 15617 | 0. 001755 | 0. 14657 | 0. 001767 |
| 1. 41056 | 0. 18278 | 0. 002106 | 0. 16744 | 0. 001561 | 0. 1825  | 0. 001733 | 0. 15746 | 0. 001759 | 0. 14813 | 0. 001768 |
| 1. 41176 | 0. 18403 | 0. 002087 | 0. 16904 | 0. 001556 | 0. 18379 | 0. 001724 | 0. 15877 | 0. 001758 | 0. 14972 | 0. 001765 |
| 1. 41297 | 0. 18527 | 0. 002059 | 0. 17066 | 0. 001546 | 0. 18508 | 0. 001708 | 0. 1601  | 0. 00175  | 0. 15132 | 0. 001756 |
| 1. 41417 | 0. 1865  | 0. 002024 | 0. 1723  | 0. 001531 | 0. 18637 | 0. 001686 | 0. 16145 | 0. 001736 | 0. 15295 | 0. 001743 |
| 1. 41537 | 0. 18772 | 0. 001981 | 0. 17395 | 0. 00151  | 0. 18766 | 0. 001658 | 0. 16281 | 0. 001716 | 0. 15461 | 0. 001724 |
| 1. 41657 | 0. 18892 | 0. 00193  | 0. 17561 | 0. 001484 | 0. 18895 | 0. 001624 | 0. 1642  | 0. 001691 | 0. 15628 | 0. 001701 |
| 1. 41777 | 0. 19012 | 0. 001874 | 0. 17729 | 0. 001453 | 0. 19024 | 0. 001584 | 0. 16561 | 0. 00166  | 0. 15798 | 0. 001673 |
| 1. 41897 | 0. 1913  | 0. 00181  | 0. 17898 | 0. 001419 | 0. 19153 | 0. 00154  | 0. 16704 | 0. 001625 | 0. 1597  | 0. 001641 |
| 1. 42017 | 0. 19247 | 0. 001742 | 0. 18068 | 0. 001382 | 0. 19281 | 0. 001492 | 0. 16849 | 0. 001586 | 0. 16144 | 0. 001607 |
