# Supplementary material for: Detection of DNA oligonucleotides with base mutations by terahertz spectroscopy and microstructures
Source: PubMed Central journal article supplement (PMC5783420; doi:10.1371/journal.pone.0191515), 2018-01-24
Supplement: pone.0191515.s005.pdf [file pone.0191515.s005.pdf]

Plotting Data of Fig. 6a

| Numer of H-Bonds |          |          |          |          |
|------------------|----------|----------|----------|----------|
| Time(ns)         | Ter-5A   | Ter-5C   | Ter-5T   | Ter-5G   |
| 0.05             | 1.89E+17 | 1.78E+17 | 1.77E+17 | 1.92E+17 |
| 0.1              | 1.79E+17 | 1.86E+17 | 1.85E+17 | 1.88E+17 |
| 0.15             | 1.74E+17 | 1.93E+17 | 1.73E+17 | 1.83E+17 |
| 0.2              | 1.88E+17 | 1.79E+17 | 1.68E+17 | 1.73E+17 |
| 0.25             | 1.73E+17 | 1.87E+17 | 1.85E+17 | 1.96E+17 |
| 0.3              | 1.75E+17 | 1.90E+17 | 1.73E+17 | 1.89E+17 |
| 0.35             | 1.78E+17 | 2.01E+17 | 1.71E+17 | 1.93E+17 |
| 0.4              | 1.85E+17 | 1.97E+17 | 1.73E+17 | 1.89E+17 |
| 0.45             | 1.82E+17 | 1.90E+17 | 1.67E+17 | 1.97E+17 |
| 0.5              | 1.83E+17 | 1.79E+17 | 1.75E+17 | 1.97E+17 |
| 0.55             | 1.86E+17 | 1.89E+17 | 1.75E+17 | 1.92E+17 |
| 0.6              | 1.83E+17 | 1.94E+17 | 1.81E+17 | 1.74E+17 |
| 0.65             | 1.82E+17 | 1.82E+17 | 1.76E+17 | 1.68E+17 |
| 0.7              | 1.87E+17 | 1.77E+17 | 1.83E+17 | 1.83E+17 |
| 0.75             | 1.98E+17 | 1.82E+17 | 1.73E+17 | 1.88E+17 |
| 0.8              | 1.86E+17 | 1.88E+17 | 1.77E+17 | 1.95E+17 |
| 0.85             | 1.85E+17 | 1.70E+17 | 1.74E+17 | 1.88E+17 |
| 0.9              | 1.90E+17 | 1.95E+17 | 1.74E+17 | 1.89E+17 |
| 0.95             | 1.84E+17 | 1.93E+17 | 1.75E+17 | 1.82E+17 |
| 1                | 1.95E+17 | 1.96E+17 | 1.79E+17 | 1.86E+17 |
| 1.05             | 1.78E+17 | 1.96E+17 | 1.62E+17 | 1.77E+17 |
| 1.1              | 1.87E+17 | 1.92E+17 | 1.72E+17 | 1.88E+17 |
| 1.15             | 1.83E+17 | 1.77E+17 | 1.79E+17 | 1.91E+17 |
| 1.2              | 1.84E+17 | 1.90E+17 | 1.68E+17 | 2.00E+17 |
| 1.25             | 1.86E+17 | 1.91E+17 | 1.69E+17 | 1.89E+17 |
| 1.3              | 1.91E+17 | 1.78E+17 | 1.83E+17 | 1.88E+17 |
| 1.35             | 1.90E+17 | 1.97E+17 | 1.78E+17 | 1.78E+17 |
| 1.4              | 1.92E+17 | 1.79E+17 | 1.69E+17 | 1.88E+17 |
| 1.45             | 1.92E+17 | 1.99E+17 | 1.56E+17 | 1.74E+17 |
| 1.5              | 1.88E+17 | 1.78E+17 | 1.77E+17 | 1.81E+17 |
| 1.55             | 1.83E+17 | 1.85E+17 | 1.71E+17 | 1.91E+17 |
| 1.6              | 1.75E+17 | 1.79E+17 | 1.77E+17 | 1.82E+17 |
| 1.65             | 1.83E+17 | 2.01E+17 | 1.75E+17 | 1.87E+17 |
| 1.7              | 1.86E+17 | 1.79E+17 | 1.78E+17 | 1.88E+17 |
| 1.75             | 1.88E+17 | 1.83E+17 | 1.81E+17 | 1.98E+17 |
| 1.8              | 1.87E+17 | 1.95E+17 | 1.69E+17 | 1.78E+17 |
| 1.85             | 1.75E+17 | 1.94E+17 | 1.79E+17 | 1.73E+17 |
| 1.9              | 1.73E+17 | 1.94E+17 | 1.69E+17 | 1.80E+17 |
| 1.95             | 1.96E+17 | 1.96E+17 | 1.76E+17 | 1.89E+17 |
| 2                | 1.81E+17 | 1.97E+17 | 1.82E+17 | 2.00E+17 |
| 2.05             | 1.83E+17 | 1.99E+17 | 1.69E+17 | 1.96E+17 |
| 2.1              | 1.75E+17 | 2.13E+17 | 1.75E+17 | 1.83E+17 |
| 2.15             | 1.97E+17 | 1.85E+17 | 1.77E+17 | 2.02E+17 |
| 2.2              | 1.85E+17 | 1.86E+17 | 1.74E+17 | 1.88E+17 |
| 2.25             | 1.87E+17 | 1.81E+17 | 1.73E+17 | 1.83E+17 |
| 2.3              | 1.83E+17 | 2.06E+17 | 1.80E+17 | 1.90E+17 |
| 2.35             | 1.84E+17 | 1.89E+17 | 1.69E+17 | 1.84E+17 |
| 2.4              | 1.84E+17 | 1.90E+17 | 1.80E+17 | 1.85E+17 |
| 2.45             | 1.77E+17 | 1.82E+17 | 1.73E+17 | 2.00E+17 |

|      |          |          |          |          |
|------|----------|----------|----------|----------|
| 2.5  | 1.84E+17 | 1.75E+17 | 1.68E+17 | 1.92E+17 |
| 2.55 | 1.77E+17 | 1.84E+17 | 1.69E+17 | 1.86E+17 |
| 2.6  | 2.01E+17 | 1.83E+17 | 1.64E+17 | 1.83E+17 |
| 2.65 | 1.79E+17 | 1.93E+17 | 1.82E+17 | 1.94E+17 |
| 2.7  | 1.78E+17 | 1.87E+17 | 1.79E+17 | 1.91E+17 |
| 2.75 | 1.95E+17 | 1.85E+17 | 1.81E+17 | 1.96E+17 |
| 2.8  | 1.91E+17 | 1.83E+17 | 1.68E+17 | 2.00E+17 |
| 2.85 | 1.87E+17 | 1.88E+17 | 1.88E+17 | 1.97E+17 |
| 2.9  | 1.82E+17 | 1.93E+17 | 1.74E+17 | 1.86E+17 |
| 2.95 | 1.69E+17 | 1.84E+17 | 1.84E+17 | 1.97E+17 |
| 3    | 1.79E+17 | 1.83E+17 | 1.67E+17 | 1.90E+17 |
| 3.05 | 1.84E+17 | 1.88E+17 | 1.66E+17 | 1.95E+17 |
| 3.1  | 1.79E+17 | 1.96E+17 | 1.78E+17 | 2.12E+17 |
| 3.15 | 1.89E+17 | 1.82E+17 | 1.78E+17 | 1.85E+17 |
| 3.2  | 1.83E+17 | 1.81E+17 | 1.76E+17 | 1.77E+17 |
| 3.25 | 1.98E+17 | 1.79E+17 | 1.67E+17 | 1.85E+17 |
| 3.3  | 1.83E+17 | 1.78E+17 | 1.69E+17 | 1.85E+17 |
| 3.35 | 1.76E+17 | 1.95E+17 | 1.80E+17 | 1.81E+17 |
| 3.4  | 1.83E+17 | 1.92E+17 | 1.71E+17 | 1.90E+17 |
| 3.45 | 1.96E+17 | 1.92E+17 | 1.89E+17 | 1.90E+17 |
| 3.5  | 1.79E+17 | 1.89E+17 | 1.71E+17 | 1.96E+17 |
| 3.55 | 1.69E+17 | 1.99E+17 | 1.80E+17 | 1.94E+17 |
| 3.6  | 1.90E+17 | 1.89E+17 | 1.78E+17 | 1.90E+17 |
| 3.65 | 1.82E+17 | 1.78E+17 | 1.71E+17 | 1.88E+17 |
| 3.7  | 1.76E+17 | 1.95E+17 | 1.81E+17 | 2.03E+17 |
| 3.75 | 1.75E+17 | 1.83E+17 | 1.72E+17 | 1.81E+17 |
| 3.8  | 1.80E+17 | 1.87E+17 | 1.79E+17 | 1.96E+17 |
| 3.85 | 1.84E+17 | 1.70E+17 | 1.78E+17 | 1.96E+17 |
| 3.9  | 1.77E+17 | 1.82E+17 | 1.74E+17 | 1.89E+17 |
| 3.95 | 1.80E+17 | 1.86E+17 | 1.79E+17 | 1.85E+17 |
| 4    | 1.83E+17 | 1.85E+17 | 1.73E+17 | 1.83E+17 |
| 4.05 | 1.87E+17 | 1.89E+17 | 1.85E+17 | 1.79E+17 |
| 4.1  | 1.84E+17 | 1.81E+17 | 1.77E+17 | 1.88E+17 |
| 4.15 | 1.80E+17 | 1.95E+17 | 1.86E+17 | 1.83E+17 |
| 4.2  | 1.81E+17 | 1.93E+17 | 1.84E+17 | 1.88E+17 |
| 4.25 | 1.65E+17 | 1.84E+17 | 1.84E+17 | 1.90E+17 |
| 4.3  | 1.83E+17 | 1.96E+17 | 1.79E+17 | 1.77E+17 |
| 4.35 | 1.64E+17 | 1.93E+17 | 1.68E+17 | 1.82E+17 |
| 4.4  | 1.84E+17 | 1.72E+17 | 1.79E+17 | 1.93E+17 |
| 4.45 | 1.71E+17 | 1.81E+17 | 1.70E+17 | 1.77E+17 |
| 4.5  | 1.99E+17 | 1.90E+17 | 1.76E+17 | 1.97E+17 |
| 4.55 | 1.98E+17 | 1.84E+17 | 1.68E+17 | 1.95E+17 |
| 4.6  | 1.74E+17 | 1.93E+17 | 1.77E+17 | 1.96E+17 |
| 4.65 | 2.00E+17 | 1.85E+17 | 1.83E+17 | 1.98E+17 |
| 4.7  | 2.04E+17 | 1.96E+17 | 1.76E+17 | 1.88E+17 |
| 4.75 | 1.78E+17 | 1.90E+17 | 1.80E+17 | 1.81E+17 |
| 4.8  | 1.65E+17 | 2.04E+17 | 1.85E+17 | 1.89E+17 |
| 4.85 | 1.85E+17 | 1.83E+17 | 1.64E+17 | 1.77E+17 |
| 4.9  | 1.88E+17 | 1.81E+17 | 1.71E+17 | 1.85E+17 |
| 4.95 | 2.02E+17 | 1.88E+17 | 1.72E+17 | 1.88E+17 |
| 5    | 1.71E+17 | 1.92E+17 | 1.65E+17 | 1.87E+17 |
| 5.05 | 1.82E+17 | 1.89E+17 | 1.70E+17 | 1.91E+17 |
| 5.1  | 1.80E+17 | 1.84E+17 | 1.58E+17 | 1.91E+17 |
| 5.15 | 1.86E+17 | 1.93E+17 | 1.82E+17 | 1.90E+17 |

|      |          |          |          |          |
|------|----------|----------|----------|----------|
| 5.2  | 1.86E+17 | 1.94E+17 | 1.74E+17 | 1.74E+17 |
| 5.25 | 1.80E+17 | 1.78E+17 | 1.76E+17 | 1.99E+17 |
| 5.3  | 1.88E+17 | 1.82E+17 | 1.74E+17 | 1.76E+17 |
| 5.35 | 1.86E+17 | 1.92E+17 | 1.71E+17 | 1.91E+17 |
| 5.4  | 1.85E+17 | 1.77E+17 | 1.76E+17 | 1.85E+17 |
| 5.45 | 1.75E+17 | 1.91E+17 | 1.77E+17 | 1.91E+17 |
| 5.5  | 1.78E+17 | 2.00E+17 | 1.80E+17 | 1.73E+17 |
| 5.55 | 1.84E+17 | 1.97E+17 | 1.79E+17 | 1.81E+17 |
| 5.6  | 1.69E+17 | 1.90E+17 | 1.76E+17 | 1.74E+17 |
| 5.65 | 1.82E+17 | 1.90E+17 | 1.85E+17 | 1.76E+17 |
| 5.7  | 1.82E+17 | 1.82E+17 | 1.66E+17 | 1.88E+17 |
| 5.75 | 1.86E+17 | 1.95E+17 | 1.85E+17 | 1.79E+17 |
| 5.8  | 1.74E+17 | 1.68E+17 | 1.77E+17 | 1.73E+17 |
| 5.85 | 1.75E+17 | 1.97E+17 | 1.85E+17 | 1.83E+17 |
| 5.9  | 1.75E+17 | 1.80E+17 | 1.73E+17 | 1.83E+17 |
| 5.95 | 1.95E+17 | 1.58E+17 | 1.80E+17 | 1.92E+17 |
| 6    | 1.71E+17 | 1.89E+17 | 1.69E+17 | 1.73E+17 |
| 6.05 | 1.78E+17 | 1.77E+17 | 1.75E+17 | 1.92E+17 |
| 6.1  | 1.80E+17 | 1.88E+17 | 1.75E+17 | 1.74E+17 |
| 6.15 | 1.78E+17 | 1.79E+17 | 1.83E+17 | 1.77E+17 |
| 6.2  | 1.80E+17 | 1.88E+17 | 1.71E+17 | 1.83E+17 |
| 6.25 | 1.75E+17 | 1.86E+17 | 1.72E+17 | 1.86E+17 |
| 6.3  | 1.57E+17 | 1.72E+17 | 1.72E+17 | 1.85E+17 |
| 6.35 | 1.78E+17 | 1.92E+17 | 1.85E+17 | 1.72E+17 |
| 6.4  | 1.83E+17 | 1.86E+17 | 1.83E+17 | 1.77E+17 |
| 6.45 | 1.80E+17 | 1.79E+17 | 1.84E+17 | 1.84E+17 |
| 6.5  | 1.67E+17 | 1.70E+17 | 1.79E+17 | 1.81E+17 |
| 6.55 | 1.76E+17 | 1.81E+17 | 1.73E+17 | 1.81E+17 |
| 6.6  | 1.78E+17 | 1.88E+17 | 1.76E+17 | 1.80E+17 |
| 6.65 | 1.79E+17 | 1.78E+17 | 1.76E+17 | 1.93E+17 |
| 6.7  | 1.78E+17 | 1.80E+17 | 1.81E+17 | 1.90E+17 |
| 6.75 | 1.79E+17 | 1.82E+17 | 1.79E+17 | 1.87E+17 |
| 6.8  | 1.73E+17 | 1.83E+17 | 1.69E+17 | 1.78E+17 |
| 6.85 | 1.88E+17 | 1.92E+17 | 1.81E+17 | 1.78E+17 |
| 6.9  | 1.88E+17 | 1.93E+17 | 1.81E+17 | 1.79E+17 |
| 6.95 | 1.77E+17 | 1.92E+17 | 1.79E+17 | 1.83E+17 |
| 7    | 1.71E+17 | 1.96E+17 | 1.77E+17 | 1.94E+17 |
| 7.05 | 1.84E+17 | 1.79E+17 | 1.80E+17 | 1.68E+17 |
| 7.1  | 1.68E+17 | 1.80E+17 | 1.75E+17 | 1.63E+17 |
| 7.15 | 1.77E+17 | 1.77E+17 | 1.73E+17 | 1.79E+17 |
| 7.2  | 1.75E+17 | 1.72E+17 | 1.66E+17 | 1.74E+17 |
| 7.25 | 1.86E+17 | 1.81E+17 | 1.84E+17 | 1.87E+17 |
| 7.3  | 1.92E+17 | 1.76E+17 | 1.87E+17 | 1.84E+17 |
| 7.35 | 1.82E+17 | 1.67E+17 | 1.71E+17 | 1.70E+17 |
| 7.4  | 1.89E+17 | 1.96E+17 | 1.67E+17 | 1.68E+17 |
| 7.45 | 1.88E+17 | 1.78E+17 | 1.89E+17 | 1.85E+17 |
| 7.5  | 1.85E+17 | 1.81E+17 | 1.85E+17 | 1.89E+17 |
| 7.55 | 1.78E+17 | 1.92E+17 | 1.84E+17 | 1.85E+17 |
| 7.6  | 1.92E+17 | 1.82E+17 | 1.76E+17 | 1.91E+17 |
| 7.65 | 1.83E+17 | 1.90E+17 | 1.87E+17 | 1.83E+17 |
| 7.7  | 1.70E+17 | 1.76E+17 | 1.80E+17 | 1.90E+17 |
| 7.75 | 1.80E+17 | 1.92E+17 | 1.73E+17 | 1.85E+17 |
| 7.8  | 1.78E+17 | 1.83E+17 | 1.89E+17 | 1.76E+17 |
| 7.85 | 1.84E+17 | 1.79E+17 | 1.71E+17 | 1.82E+17 |

|      |          |          |          |          |
|------|----------|----------|----------|----------|
| 7.9  | 1.74E+17 | 1.97E+17 | 1.79E+17 | 1.89E+17 |
| 7.95 | 1.89E+17 | 1.79E+17 | 1.79E+17 | 1.85E+17 |
| 8    | 1.72E+17 | 1.77E+17 | 1.77E+17 | 1.81E+17 |
| 8.05 | 1.84E+17 | 1.88E+17 | 1.68E+17 | 1.74E+17 |
| 8.1  | 1.79E+17 | 1.91E+17 | 1.59E+17 | 1.88E+17 |
| 8.15 | 1.87E+17 | 1.84E+17 | 1.75E+17 | 1.90E+17 |
| 8.2  | 1.74E+17 | 1.82E+17 | 1.80E+17 | 1.74E+17 |
| 8.25 | 1.81E+17 | 1.93E+17 | 1.68E+17 | 1.86E+17 |
| 8.3  | 1.88E+17 | 1.85E+17 | 1.71E+17 | 1.89E+17 |
| 8.35 | 1.80E+17 | 1.90E+17 | 1.80E+17 | 1.83E+17 |
| 8.4  | 1.81E+17 | 1.90E+17 | 1.79E+17 | 1.90E+17 |
| 8.45 | 1.75E+17 | 1.79E+17 | 1.84E+17 | 1.87E+17 |
| 8.5  | 1.91E+17 | 2.00E+17 | 1.77E+17 | 1.84E+17 |
| 8.55 | 1.88E+17 | 1.81E+17 | 1.72E+17 | 1.88E+17 |
| 8.6  | 1.84E+17 | 1.83E+17 | 1.81E+17 | 1.88E+17 |
| 8.65 | 1.97E+17 | 1.96E+17 | 1.86E+17 | 1.82E+17 |
| 8.7  | 1.97E+17 | 1.78E+17 | 1.84E+17 | 1.95E+17 |
| 8.75 | 1.91E+17 | 1.93E+17 | 1.72E+17 | 1.78E+17 |
| 8.8  | 1.87E+17 | 1.74E+17 | 1.67E+17 | 1.79E+17 |
| 8.85 | 1.69E+17 | 1.84E+17 | 1.91E+17 | 1.90E+17 |
| 8.9  | 1.86E+17 | 1.89E+17 | 1.73E+17 | 1.85E+17 |
| 8.95 | 1.86E+17 | 1.82E+17 | 1.77E+17 | 1.86E+17 |
| 9    | 1.86E+17 | 1.82E+17 | 1.64E+17 | 1.78E+17 |
| 9.05 | 1.76E+17 | 1.92E+17 | 1.74E+17 | 1.87E+17 |
| 9.1  | 1.93E+17 | 1.80E+17 | 1.82E+17 | 1.92E+17 |
| 9.15 | 1.87E+17 | 1.74E+17 | 1.61E+17 | 1.81E+17 |
| 9.2  | 1.94E+17 | 1.81E+17 | 1.71E+17 | 1.79E+17 |
| 9.25 | 1.79E+17 | 1.87E+17 | 1.91E+17 | 1.96E+17 |
| 9.3  | 1.75E+17 | 1.74E+17 | 2.00E+17 | 1.93E+17 |
| 9.35 | 1.76E+17 | 1.89E+17 | 1.88E+17 | 1.93E+17 |
| 9.4  | 1.94E+17 | 1.87E+17 | 1.67E+17 | 1.78E+17 |
| 9.45 | 1.94E+17 | 1.80E+17 | 1.88E+17 | 1.86E+17 |
| 9.5  | 1.90E+17 | 1.63E+17 | 1.84E+17 | 1.93E+17 |
| 9.55 | 1.87E+17 | 1.84E+17 | 1.83E+17 | 1.82E+17 |
| 9.6  | 1.97E+17 | 1.82E+17 | 1.93E+17 | 1.96E+17 |
| 9.65 | 1.94E+17 | 1.75E+17 | 1.80E+17 | 1.85E+17 |
| 9.7  | 2.05E+17 | 1.87E+17 | 1.66E+17 | 1.99E+17 |
| 9.75 | 1.87E+17 | 1.96E+17 | 1.73E+17 | 1.91E+17 |
| 9.8  | 1.81E+17 | 1.84E+17 | 1.77E+17 | 1.92E+17 |
| 9.85 | 1.96E+17 | 1.85E+17 | 1.80E+17 | 1.84E+17 |
| 9.9  | 1.89E+17 | 1.85E+17 | 1.73E+17 | 1.85E+17 |
| 9.95 | 1.72E+17 | 1.96E+17 | 1.85E+17 | 1.86E+17 |
| 10   | 1.80E+17 | 1.95E+17 | 1.83E+17 | 1.86E+17 |
