# Supplementary material for: Detection of DNA oligonucleotides with base mutations by terahertz spectroscopy and microstructures
Source: PubMed Central journal article supplement (PMC5783420; doi:10.1371/journal.pone.0191515), 2018-01-24
Supplement: pone.0191515.s006.pdf [file pone.0191515.s006.pdf]

Plotting Data of Fig. 6b

|      | Average  | SD       |
|------|----------|----------|
| TA-T | 1.76E+17 | 1.86E+15 |
| TA-A | 1.83E+17 | 2.88E+15 |
| TA-G | 1.86E+17 | 3.19E+15 |
| TA-C | 1.86E+17 | 2.62E+15 |
